# Supplementary material for: Assessment and refinement of eukaryotic gene structure prediction with gene-structure-aware multiple protein sequence alignment
Source: PubMed Central journal article supplement (PMC4065584; doi:10.1186/1471-2105-15-189), 2014-06-14
Supplement: 1471-2105-15-189-S2.pdf [file 1471-2105-15-189-S2.pdf]

Table S1A Assessment by EST mapping (P450 all original)

| Species  | NoEST | NoIntR | NoIntQ | IntTP | IntFP | IntFN | JuncTP | IntHS_TP |
|----------|-------|--------|--------|-------|-------|-------|--------|----------|
| Aquicoer | 144   | 385    | 389    | 367   | 6     | 1     | 751    | 1        |
| Arablyra | 79    | 163    | 171    | 153   | 8     | 0     | 312    | 5        |
| Arabthal | 239   | 658    | 659    | 650   | 3     | 2     | 1305   | 1        |
| Bracdist | 64    | 208    | 209    | 204   | 2     | 1     | 411    | 2        |
| Brasrapa | 80    | 171    | 174    | 162   | 5     | 0     | 331    | 3        |
| Camesine | 38    | 173    | 173    | 170   | 0     | 0     | 342    | 0        |
| Caripapa | 30    | 59     | 61     | 56    | 2     | 0     | 114    | 2        |
| Chlarein | 15    | 101    | 105    | 100   | 1     | 0     | 200    | 0        |
| Chlovulg | 17    | 67     | 67     | 64    | 0     | 0     | 131    | 0        |
| Citrclm  | 95    | 169    | 175    | 167   | 6     | 1     | 335    | 3        |
| Coccsube | 15    | 61     | 62     | 60    | 0     | 0     | 122    | 0        |
| Cucusati | 174   | 535    | 548    | 514   | 15    | 3     | 1045   | 4        |
| Eucagran | 54    | 72     | 74     | 68    | 2     | 0     | 140    | 2        |
| Fragvesc | 187   | 572    | 587    | 510   | 16    | 3     | 1066   | 5        |
| Glycmax_ | 234   | 708    | 720    | 700   | 10    | 0     | 1407   | 2        |
| Gossraim | 139   | 361    | 370    | 344   | 15    | 3     | 702    | 10       |
| Jatrcurc | 28    | 50     | 54     | 47    | 3     | 0     | 98     | 1        |
| Lotujapo | 11    | 21     | 21     | 20    | 0     | 0     | 40     | 0        |
| Maniescu | 58    | 102    | 106    | 100   | 3     | 0     | 201    | 2        |
| Meditrun | 109   | 328    | 330    | 325   | 4     | 1     | 650    | 2        |
| Micrpusi | 1     | 1      | 1      | 1     | 0     | 0     | 2      | 0        |
| Mimugutt | 96    | 223    | 230    | 219   | 9     | 2     | 439    | 0        |
| Oryzsati | 260   | 699    | 703    | 681   | 5     | 2     | 1375   | 3        |
| Ostrluci | 2     | 2      | 2      | 2     | 0     | 0     | 4      | 0        |
| Phasvulg | 62    | 155    | 157    | 152   | 3     | 0     | 306    | 1        |
| Physpate | 68    | 240    | 242    | 235   | 2     | 1     | 471    | 0        |
| Poputric | 105   | 350    | 342    | 321   | 7     | 10    | 656    | 2        |
| Prunpers | 38    | 65     | 75     | 65    | 10    | 0     | 130    | 9        |
| Ricicomm | 205   | 565    | 565    | 563   | 1     | 1     | 1126   | 0        |
| Selamoel | 52    | 169    | 169    | 167   | 1     | 1     | 335    | 0        |
| Solalyco | 123   | 302    | 307    | 296   | 7     | 2     | 596    | 6        |
| Solatube | 136   | 248    | 249    | 235   | 7     | 6     | 478    | 3        |
| Sorgbico | 138   | 333    | 334    | 332   | 1     | 0     | 664    | 0        |
| Thelhalo | 35    | 93     | 97     | 89    | 3     | 0     | 182    | 2        |
| Theocaca | 82    | 172    | 176    | 164   | 5     | 0     | 334    | 2        |
| Vitivini | 195   | 506    | 644    | 485   | 143   | 3     | 978    | 22       |
| Volvcart | 8     | 35     | 34     | 31    | 0     | 1     | 65     | 0        |
| Zea_mays | 213   | 550    | 553    | 539   | 6     | 5     | 1080   | 3        |
| Total    | 3629  | 9672   | 9935   | 9358  | 311   | 49    | 18924  | 98       |

|       |          |            |
|-------|----------|------------|
|       | Raw      | with HS_TP |
| IntSn | 98       | 98.54545   |
| IntSp | 97.46835 | 98.01085   |
| JncSn | 98.18182 | 98.72727   |
| JncSp | 97.64919 | 98.19168   |
| FPR   | 3.130347 | 2.143936   |
| FNR   | 0.506617 | 0.506617   |

Table S1B Assessment by EST mapping (RBP all original)

| Species      | NoEST        | NoIntR       | NoIntQ       | IntTP        | IntFP      | IntFN     | JuncTP       | IntHS_TP   |
|--------------|--------------|--------------|--------------|--------------|------------|-----------|--------------|------------|
| Aquicoer     | 205          | 680          | 692          | 656          | 16         | 3         | 1331         | 14         |
| Arablyra     | 263          | 740          | 755          | 711          | 7          | 0         | 1434         | 3          |
| Arabthal     | 395          | 1090         | 1099         | 1078         | 5          | 1         | 2169         | 3          |
| Bracdist     | 339          | 983          | 990          | 963          | 5          | 0         | 1943         | 2          |
| Brasrapa     | 376          | 1012         | 1018         | 981          | 13         | 5         | 1986         | 11         |
| Camesine     | 208          | 528          | 527          | 500          | 4          | 5         | 1020         | 0          |
| Caripapa     | 177          | 466          | 477          | 455          | 9          | 0         | 920          | 3          |
| Chlarein     | 121          | 428          | 427          | 425          | 0          | 0         | 852          | 0          |
| Chlovulg     | 116          | 394          | 392          | 386          | 0          | 0         | 778          | 0          |
| Citrclem     | 254          | 706          | 707          | 689          | 4          | 1         | 1394         | 3          |
| Coccsube     | 90           | 305          | 304          | 300          | 0          | 0         | 603          | 0          |
| Cucusati     | 389          | 1147         | 1145         | 1102         | 5          | 2         | 2246         | 2          |
| Eucagran     | 283          | 796          | 802          | 731          | 11         | 3         | 1508         | 6          |
| Fragvesc     | 200          | 592          | 603          | 557          | 11         | 1         | 1141         | 1          |
| Glycmax_     | 657          | 1978         | 1994         | 1945         | 16         | 1         | 3915         | 4          |
| Gossrain     | 406          | 1209         | 1213         | 1107         | 15         | 4         | 2287         | 11         |
| Maniescu     | 336          | 991          | 997          | 951          | 9          | 1         | 1934         | 5          |
| Meditrun     | 209          | 613          | 621          | 609          | 5          | 0         | 1224         | 2          |
| Micrpusi     | 63           | 106          | 109          | 105          | 3          | 0         | 210          | 3          |
| Micrrcc2     | 65           | 103          | 102          | 96           | 0          | 1         | 194          | 0          |
| Mimugutt     | 279          | 880          | 884          | 874          | 4          | 0         | 1754         | 1          |
| Oryzsati     | 334          | 966          | 976          | 950          | 4          | 0         | 1918         | 3          |
| Ostrluci     | 74           | 102          | 102          | 101          | 0          | 0         | 202          | 0          |
| Ostrrcc8     | 28           | 38           | 43           | 36           | 5          | 0         | 73           | 5          |
| Phasvulg     | 263          | 805          | 810          | 801          | 5          | 0         | 1606         | 0          |
| Physpate     | 466          | 1372         | 1386         | 1359         | 11         | 0         | 2732         | 4          |
| Poputric     | 659          | 2044         | 2031         | 1923         | 22         | 13        | 3928         | 6          |
| Prunpers     | 199          | 570          | 570          | 566          | 1          | 0         | 1135         | 0          |
| Ricicomm     | 235          | 713          | 713          | 712          | 0          | 0         | 1424         | 0          |
| Selamoel     | 91           | 268          | 268          | 263          | 1          | 1         | 529          | 1          |
| Solalyco     | 271          | 844          | 852          | 825          | 8          | 0         | 1668         | 5          |
| Solatube     | 313          | 918          | 914          | 889          | 2          | 4         | 1799         | 1          |
| Sorgbico     | 280          | 824          | 828          | 819          | 4          | 0         | 1642         | 1          |
| Thelhalo     | 216          | 608          | 608          | 598          | 2          | 1         | 1204         | 2          |
| Theocaca     | 286          | 804          | 810          | 768          | 6          | 2         | 1566         | 3          |
| Vitivini     | 236          | 680          | 720          | 671          | 38         | 0         | 1352         | 10         |
| Volvcart     | 122          | 419          | 421          | 414          | 1          | 0         | 834          | 0          |
| Zea_mays     | 765          | 1976         | 1975         | 1892         | 18         | 7         | 3833         | 13         |
| <b>Total</b> | <b>10269</b> | <b>29698</b> | <b>29885</b> | <b>28808</b> | <b>270</b> | <b>56</b> | <b>58288</b> | <b>128</b> |

|       | Raw      | with HS_TP |
|-------|----------|------------|
| IntSn | 95.74899 | 96.40688   |
| IntSp | 95.79747 | 96.4557    |
| JncSn | 96.98887 | 97.64676   |
| JncSp | 97.03797 | 97.6962    |
| FPR   | 0.903463 | 0.475155   |
| FNR   | 0.188565 | 0.188565   |

Table S1C Assessment by EST mapping (P450 filtered original)

| Species  | NoEST | NoIntR | NoIntQ | IntTP | IntFP | IntFN | JuncTP | IntHS_FP |
|----------|-------|--------|--------|-------|-------|-------|--------|----------|
| Aquicoer | 89    | 204    | 208    | 199   | 5     | 1     | 402    | 1        |
| Arablyra | 74    | 159    | 167    | 149   | 8     | 0     | 304    | 5        |
| Arabthal | 193   | 508    | 507    | 503   | 1     | 2     | 1009   | 1        |
| Bracdist | 52    | 153    | 154    | 152   | 1     | 0     | 305    | 0        |
| Brasrapa | 72    | 162    | 165    | 155   | 5     | 0     | 315    | 3        |
| Camesine | 11    | 41     | 41     | 41    | 0     | 0     | 82     | 0        |
| Caripapa | 25    | 51     | 53     | 49    | 2     | 0     | 100    | 2        |
| Chlarein | 13    | 89     | 93     | 88    | 1     | 0     | 176    | 0        |
| Chlovulg | 11    | 46     | 46     | 45    | 0     | 0     | 91     | 0        |
| Citrclem | 72    | 123    | 127    | 121   | 4     | 1     | 243    | 2        |
| Coccsube | 10    | 44     | 45     | 43    | 0     | 0     | 88     | 0        |
| Cucusati | 147   | 405    | 413    | 390   | 9     | 2     | 793    | 4        |
| Eucagran | 39    | 56     | 56     | 55    | 0     | 0     | 111    | 0        |
| Fragvesc | 135   | 455    | 462    | 406   | 10    | 1     | 849    | 5        |
| Glycmax_ | 186   | 532    | 538    | 528   | 5     | 0     | 1060   | 1        |
| Gossrain | 80    | 162    | 169    | 158   | 9     | 2     | 318    | 6        |
| Jatrcurc | 19    | 36     | 40     | 34    | 3     | 0     | 71     | 1        |
| Lotujapo | 10    | 18     | 18     | 17    | 0     | 0     | 34     | 0        |
| Maniescu | 42    | 72     | 75     | 70    | 2     | 0     | 141    | 2        |
| Meditrun | 92    | 271    | 271    | 268   | 2     | 1     | 536    | 2        |
| Micrpusi | 1     | 1      | 1      | 1     | 0     | 0     | 2      | 0        |
| Mimugutt | 80    | 183    | 191    | 181   | 9     | 1     | 363    | 0        |
| Oryzsati | 195   | 497    | 503    | 487   | 5     | 1     | 983    | 3        |
| Ostrluci | 1     | 1      | 1      | 1     | 0     | 0     | 2      | 0        |
| Phasvulg | 53    | 128    | 131    | 127   | 3     | 0     | 254    | 1        |
| Physpate | 43    | 147    | 147    | 143   | 0     | 1     | 287    | 0        |
| Poputric | 51    | 136    | 137    | 130   | 5     | 4     | 262    | 1        |
| Prunpers | 36    | 64     | 73     | 64    | 9     | 0     | 128    | 9        |
| Ricicomm | 143   | 454    | 454    | 454   | 0     | 0     | 908    | 0        |
| Selamoel | 40    | 136    | 136    | 135   | 0     | 0     | 271    | 0        |
| Solalyco | 117   | 278    | 282    | 272   | 6     | 2     | 548    | 6        |
| Solatube | 77    | 165    | 165    | 159   | 2     | 3     | 322    | 2        |
| Sorgbico | 121   | 279    | 279    | 278   | 0     | 0     | 556    | 0        |
| Thelhalo | 31    | 82     | 84     | 80    | 1     | 0     | 162    | 0        |
| Theocaca | 48    | 99     | 100    | 97    | 1     | 0     | 196    | 0        |
| Vitivini | 119   | 371    | 443    | 362   | 72    | 0     | 728    | 22       |
| Volvcart | 5     | 24     | 23     | 20    | 0     | 1     | 43     | 0        |
| Zea_mays | 152   | 403    | 408    | 398   | 5     | 2     | 798    | 3        |
| Total    | 2685  | 7035   | 7206   | 6860  | 185   | 25    | 13841  | 82       |

|       |          |            |
|-------|----------|------------|
|       | Raw      | 2ith HS_TP |
| IntSn | 98.75931 | 99.50372   |
| IntSp | 97.54902 | 98.28431   |
| JncSn | 99.00744 | 99.75186   |
| JncSp | 97.79412 | 98.52941   |
| FPR   | 2.567305 | 1.429364   |
| FNR   | 0.355366 | 0.355366   |

Table S1D Assessment by EST mapping (RBP filtered original)

| Species  | NoEST | NoIntR | NoIntQ | IntTP | IntFP | IntFN | JuncTP | IntHS_TP |
|----------|-------|--------|--------|-------|-------|-------|--------|----------|
| Aquicoer | 114   | 372    | 379    | 365   | 9     | 2     | 734    | 9        |
| Arablyra | 262   | 738    | 753    | 709   | 7     | 0     | 1430   | 3        |
| Arabthal | 288   | 811    | 818    | 805   | 3     | 1     | 1618   | 2        |
| Bracdist | 244   | 719    | 724    | 709   | 4     | 0     | 1428   | 1        |
| Brasrapa | 372   | 1006   | 1011   | 975   | 12    | 5     | 1974   | 11       |
| Camesine | 99    | 260    | 257    | 249   | 1     | 4     | 505    | 0        |
| Caripapa | 162   | 423    | 434    | 413   | 9     | 0     | 835    | 3        |
| Chlarein | 97    | 348    | 348    | 347   | 0     | 0     | 695    | 0        |
| Chlovulg | 104   | 352    | 352    | 350   | 0     | 0     | 702    | 0        |
| Citrclcm | 166   | 471    | 473    | 466   | 4     | 1     | 936    | 3        |
| Coccsube | 83    | 281    | 281    | 278   | 0     | 0     | 558    | 0        |
| Cucusati | 236   | 702    | 704    | 685   | 4     | 1     | 1387   | 1        |
| Eucagran | 169   | 460    | 460    | 439   | 2     | 2     | 893    | 0        |
| Fragvesc | 188   | 554    | 564    | 529   | 7     | 1     | 1080   | 1        |
| Glycmax_ | 484   | 1501   | 1515   | 1475  | 14    | 1     | 2970   | 4        |
| Gossraim | 184   | 548    | 550    | 516   | 8     | 4     | 1053   | 6        |
| Maniescu | 242   | 731    | 732    | 718   | 3     | 1     | 1445   | 2        |
| Meditrun | 178   | 536    | 544    | 532   | 5     | 0     | 1070   | 2        |
| Micrpusi | 61    | 102    | 105    | 101   | 3     | 0     | 202    | 3        |
| Micrrcc2 | 61    | 96     | 95     | 89    | 0     | 1     | 180    | 0        |
| Mimugutt | 219   | 678    | 683    | 676   | 4     | 0     | 1354   | 1        |
| Oryzsati | 263   | 777    | 785    | 767   | 1     | 0     | 1549   | 1        |
| Ostrluci | 69    | 94     | 94     | 93    | 0     | 0     | 186    | 0        |
| Ostrrcc8 | 26    | 35     | 40     | 33    | 5     | 0     | 67     | 5        |
| Phasvulg | 237   | 739    | 744    | 736   | 5     | 0     | 1475   | 0        |
| Physpate | 385   | 1115   | 1124   | 1105  | 6     | 0     | 2222   | 1        |
| Poputric | 346   | 1079   | 1069   | 1033  | 5     | 10    | 2096   | 2        |
| Prunpers | 184   | 529    | 528    | 526   | 0     | 0     | 1054   | 0        |
| Ricicomm | 229   | 688    | 688    | 687   | 0     | 0     | 1374   | 0        |
| Selamoel | 87    | 257    | 257    | 253   | 1     | 1     | 508    | 1        |
| Solalyco | 269   | 833    | 841    | 814   | 8     | 0     | 1646   | 5        |
| Solatube | 246   | 743    | 741    | 729   | 2     | 2     | 1468   | 0        |
| Sorgbico | 256   | 764    | 768    | 762   | 3     | 0     | 1527   | 1        |
| Thelhalo | 181   | 514    | 514    | 509   | 2     | 1     | 1021   | 2        |
| Theocaca | 198   | 574    | 581    | 554   | 4     | 1     | 1126   | 2        |
| Vitivini | 227   | 661    | 700    | 653   | 37    | 0     | 1315   | 9        |
| Volvcart | 94    | 318    | 318    | 314   | 0     | 0     | 632    | 0        |
| Zea_mays | 459   | 1250   | 1239   | 1196  | 3     | 6     | 2426   | 2        |
| Total    | 7769  | 22659  | 22813  | 22190 | 181   | 45    | 44741  | 83       |

|       | Raw      | with HS_TP |
|-------|----------|------------|
| IntSn | 97.93018 | 98.29648   |
| IntSp | 97.2691  | 97.63293   |
| JncSn | 98.72678 | 99.09308   |
| JncSp | 98.06032 | 98.42414   |
| FPR   | 0.793407 | 0.42958    |
| FNR   | 0.198597 | 0.198597   |

Table S1E Assessment by EST mapping (P450 refined)

| Species  | NoEST | NoIntR | NoIntQ | IntTP | IntFP | IntFN | JuncTP | IntHS_TP |
|----------|-------|--------|--------|-------|-------|-------|--------|----------|
| Aquicoer | 86    | 201    | 204    | 197   | 3     | 1     | 398    | 1        |
| Arablyra | 73    | 157    | 159    | 151   | 2     | 1     | 307    | 1        |
| Arabthal | 193   | 502    | 516    | 488   | 5     | 1     | 987    | 5        |
| Bracdist | 53    | 150    | 152    | 148   | 1     | 0     | 298    | 2        |
| Brasrapa | 68    | 161    | 167    | 158   | 3     | 0     | 318    | 2        |
| Camesine | 11    | 42     | 41     | 40    | 0     | 1     | 81     | 0        |
| Caripapa | 25    | 51     | 54     | 48    | 3     | 0     | 99     | 2        |
| Chlarein | 11    | 81     | 81     | 81    | 0     | 0     | 162    | 0        |
| Chlovulg | 11    | 46     | 46     | 46    | 0     | 0     | 92     | 0        |
| Citrclem | 71    | 121    | 124    | 120   | 3     | 0     | 241    | 3        |
| Coccsube | 10    | 43     | 43     | 43    | 0     | 0     | 86     | 0        |
| Cucusati | 144   | 407    | 412    | 395   | 5     | 3     | 800    | 4        |
| Eucagran | 37    | 56     | 56     | 55    | 0     | 0     | 111    | 0        |
| Fragvesc | 138   | 455    | 457    | 448   | 0     | 0     | 902    | 0        |
| Glycmax_ | 186   | 532    | 537    | 526   | 4     | 0     | 1058   | 0        |
| Gossraim | 80    | 162    | 171    | 162   | 9     | 0     | 324    | 8        |
| Jatrcurc | 17    | 34     | 36     | 34    | 2     | 0     | 68     | 0        |
| Lotujapo | 10    | 18     | 19     | 16    | 0     | 0     | 34     | 0        |
| Maniescu | 42    | 72     | 75     | 71    | 2     | 0     | 142    | 1        |
| Meditrun | 93    | 256    | 266    | 245   | 12    | 1     | 497    | 5        |
| Micrpusi | 1     | 1      | 1      | 1     | 0     | 0     | 2      | 0        |
| Mimugutt | 77    | 184    | 193    | 181   | 2     | 1     | 364    | 0        |
| Oryzsati | 195   | 494    | 495    | 476   | 7     | 1     | 961    | 3        |
| Ostrluci | 1     | 1      | 2      | 1     | 1     | 0     | 2      | 0        |
| Phasvulg | 53    | 128    | 130    | 127   | 2     | 0     | 254    | 1        |
| Physpate | 45    | 145    | 149    | 134   | 4     | 1     | 273    | 1        |
| Poputric | 50    | 137    | 135    | 129   | 2     | 4     | 262    | 0        |
| Prunpers | 35    | 62     | 71     | 62    | 9     | 0     | 124    | 9        |
| Ricicomm | 142   | 437    | 434    | 418   | 2     | 6     | 844    | 1        |
| Selamoel | 37    | 122    | 123    | 119   | 0     | 0     | 242    | 0        |
| Solalyco | 117   | 277    | 283    | 272   | 8     | 2     | 547    | 7        |
| Solatube | 76    | 171    | 169    | 167   | 0     | 2     | 335    | 0        |
| Sorgbico | 120   | 276    | 275    | 272   | 0     | 1     | 547    | 0        |
| Thelhalo | 31    | 81     | 83     | 79    | 1     | 0     | 161    | 1        |
| Theocaca | 46    | 96     | 97     | 93    | 1     | 0     | 189    | 1        |
| Vitivini | 119   | 368    | 369    | 367   | 2     | 1     | 734    | 1        |
| Volvcart | 5     | 24     | 24     | 20    | 1     | 1     | 42     | 0        |
| Zea_mays | 150   | 403    | 410    | 400   | 8     | 1     | 802    | 3        |
| Total    | 2659  | 6954   | 7059   | 6790  | 104   | 29    | 13690  | 62       |

|       |          |            |
|-------|----------|------------|
|       | Raw      | with HS_TP |
| IntSn | 97.64165 | 98.53322   |
| IntSp | 96.18926 | 97.06757   |
| JncSn | 98.43256 | 99.32413   |
| JncSp | 96.96841 | 97.84672   |
| FPR   | 1.473297 | 0.594985   |
| FNR   | 0.417026 | 0.417026   |

Table S1F Assessment by EST mapping (RBP refined)

| Species  | NoEST | NoIntR | NoIntQ | IntTP | IntFP | IntFN | JuncTP | IntHS_TP |
|----------|-------|--------|--------|-------|-------|-------|--------|----------|
| Aquicoer | 111   | 366    | 377    | 361   | 12    | 0     | 725    | 10       |
| Arablyra | 262   | 738    | 749    | 731   | 6     | 0     | 1467   | 4        |
| Arabthal | 289   | 803    | 809    | 797   | 7     | 2     | 1597   | 5        |
| Bracdist | 242   | 709    | 711    | 706   | 1     | 0     | 1416   | 0        |
| Brasrapa | 374   | 1027   | 1042   | 1013  | 13    | 1     | 2038   | 11       |
| Camesine | 99    | 259    | 259    | 245   | 1     | 1     | 496    | 1        |
| Caripapa | 162   | 426    | 436    | 419   | 10    | 0     | 844    | 3        |
| Chlarein | 97    | 344    | 342    | 341   | 0     | 0     | 684    | 0        |
| Chlovulg | 104   | 359    | 355    | 351   | 0     | 0     | 708    | 0        |
| Citrclem | 165   | 473    | 479    | 470   | 6     | 1     | 943    | 2        |
| Coccsube | 83    | 283    | 279    | 270   | 0     | 0     | 551    | 0        |
| Cucusati | 236   | 712    | 718    | 686   | 5     | 1     | 1389   | 3        |
| Eucagran | 168   | 448    | 453    | 438   | 3     | 0     | 887    | 1        |
| Fragvesc | 185   | 543    | 548    | 533   | 6     | 0     | 1070   | 2        |
| Glycmax_ | 495   | 1528   | 1551   | 1482  | 18    | 0     | 3002   | 10       |
| Gossrain | 184   | 549    | 559    | 538   | 9     | 1     | 1083   | 8        |
| Maniescu | 240   | 717    | 720    | 705   | 8     | 0     | 1418   | 4        |
| Meditrun | 170   | 478    | 485    | 471   | 10    | 0     | 946    | 6        |
| Micrpusi | 58    | 100    | 104    | 96    | 4     | 0     | 196    | 3        |
| Micrrcc2 | 61    | 94     | 98     | 93    | 4     | 0     | 186    | 3        |
| Mimugutt | 217   | 667    | 675    | 655   | 6     | 0     | 1318   | 2        |
| Oryzsati | 271   | 787    | 810    | 774   | 16    | 0     | 1559   | 9        |
| Ostrluci | 70    | 92     | 96     | 88    | 5     | 2     | 178    | 3        |
| Ostrrcc8 | 26    | 38     | 45     | 37    | 6     | 0     | 76     | 5        |
| Phasvulg | 239   | 727    | 733    | 721   | 8     | 0     | 1447   | 3        |
| Physpate | 395   | 1105   | 1140   | 1072  | 30    | 0     | 2174   | 10       |
| Poputric | 344   | 1055   | 1059   | 1039  | 9     | 3     | 2089   | 6        |
| Prunpers | 183   | 518    | 519    | 513   | 0     | 0     | 1030   | 0        |
| Ricicomm | 221   | 639    | 638    | 610   | 2     | 2     | 1240   | 2        |
| Selamoel | 95    | 273    | 279    | 265   | 7     | 0     | 534    | 4        |
| Solalyco | 268   | 812    | 814    | 798   | 5     | 0     | 1607   | 4        |
| Solatube | 252   | 757    | 761    | 748   | 7     | 2     | 1501   | 3        |
| Sorgbico | 257   | 753    | 762    | 743   | 7     | 0     | 1493   | 5        |
| Thelhalo | 181   | 511    | 514    | 509   | 2     | 0     | 1021   | 2        |
| Theocaca | 201   | 569    | 571    | 557   | 3     | 0     | 1124   | 1        |
| Vitivini | 216   | 654    | 660    | 644   | 8     | 0     | 1296   | 3        |
| Volvcart | 94    | 318    | 318    | 315   | 0     | 0     | 632    | 0        |
| Zea_mays | 470   | 1251   | 1271   | 1187  | 27    | 3     | 2421   | 12       |
| Total    | 7785  | 22482  | 22739  | 22021 | 271   | 19    | 44386  | 150      |

|       | Raw      | with HS_TP |
|-------|----------|------------|
| IntSn | 97.94947 | 98.61667   |
| IntSp | 96.84243 | 97.50209   |
| JncSn | 98.71453 | 99.38173   |
| JncSp | 97.59884 | 98.2585    |
| FPR   | 1.191785 | 0.532125   |
| FNR   | 0.084512 | 0.084512   |

Table S2A Mnual Assessment of Peach P450 Genes

| KOG-PID  | PeachID     | Subfamily | Chrom. | Strand | Cluster | Phytozome | Comment         | Refs | Comment      |
|----------|-------------|-----------|--------|--------|---------|-----------|-----------------|------|--------------|
| 17641033 | ppa005745m  | CYP88A    | 5      | -      | 16      | E         | short N         | C    |              |
| 17641081 | ppa026875m  | CYP715A   | 2      | +      | 394     | C         |                 | C    |              |
| 17641236 |             |           | 5      | +      | 0       | F         | 173aa           | F    |              |
| 17641348 | ppa004078m  | CYP86A    | 5      | -      | 420     | C         |                 | C    |              |
| 17641366 | ppa023692m  | CYP734A   | 1      | +      | 374     | C         |                 | C    |              |
| 17641500 | ppb017968m  |           | 1      | +      | 0       | F         | 243aa           | F    | G?           |
| 17641532 | ppa002280m  | reductase | 1      | +      | 480     | X         |                 | X    |              |
| 17641582 | ppa018300m  |           | 4      | -      | 0       | F         | 194aa           | F    |              |
| 17641722 | ppa016513m  | CYP81B    | 1      | +      | 249     | E         | short C         | C    |              |
| 17641732 | ppa004569m  | CYP82G    | 8      | -      | 222     | E         | extra I         | C    |              |
| 17642122 | ppa004592m  | CYP94C    | 6      | -      | 437     | C         |                 | C    |              |
| 17642372 | ppa019319m  | CYP94A    | 8      | -      | 447     | E         | non start codon | C    |              |
| 17642385 | ppa017703m  | CYP82C    | 1      | -      | 209     | E         | short N         | C    |              |
| 17642457 | ppa023623m  | CYP720A   | 5      | +      | 49      | C         |                 | C    |              |
| 17642522 | ppa005059m  | CYP707A   | 5      | +      | 4       | C         |                 | C    |              |
| 17643034 | ppa026777m  | CYP734A   | 7      | +      | 382     | C         |                 | C    |              |
| 17643059 | ppa026952m  | CYP76F    | 1      | +      | 149     | C         |                 | C    |              |
| 17643169 | ppa017300m  | CYP82C    | 3      | -      | 211     | C         |                 | C    |              |
| 17643207 | ppa026370m  | CYP77B    | 7      | +      | 286     | C         |                 | C    |              |
| 17643213 | ppa003997m  | CYP78A    | 2      | -      | 274     | E         | extra I         | C    |              |
| 17643387 | ppa019821m  | CYP93A    | 7      | +      | 225     | C         |                 | C    |              |
| 17643533 | ppa019694m  |           | 1      | +      | 0       | F         | 143aa           | F    |              |
| 17643605 | ppa004444m  | CYP94A    | 8      | -      | 447     | C         |                 | C    |              |
| 17643882 | ppa027164m  | CYP706A   | 5      | +      | 200     | C         |                 | C    |              |
| 17643885 | ppa017464m  | CYP82C    | 1      | -      | 215     | E         | short N         | C    |              |
| 17643926 | ppa004832m  | CYP92A    | 7      | -      | 173     | E         | extra I         | c    | FS           |
| 17644135 | ppa004606m  | CYP76F    | 5      | -      | 149     | C         |                 | C    |              |
| 17644145 | ppa015588m  | CYP734A   | 1      | -      | 374     | C         |                 | C    |              |
| 17644410 | ppa017328m  | CYP725A   | 4      | -      | 21      | C         |                 | C    |              |
| 17644601 | ppb018168m  |           | 1      | +      | 0       | F         | 180aa           | F    |              |
| 17644659 | ppa022132m  | CYP76F    | 1      | -      | 149     | C         |                 | C    |              |
| 17644816 | ppa004443m  | CYP76F    | 8      | +      | 282     | E         | many defects    | C    |              |
| 17645100 | ppa023159m  |           | 1      | +      | 0       | F         | 99aa            | F    |              |
| 17645137 | ppa017206m  | CYP71A    | 3      | -      | 119     | C         |                 | C    |              |
| 17645204 | ppa003882m  | CYP78A    | 5      | -      | 276     | C         |                 | C    |              |
| 17645260 | ppa018724m  | CYP734A   | 1      | -      | 374     | C         |                 | C    |              |
| 17645473 | ppa024054m  |           | 5      | +      | 0       | F         | 243aa           | F    |              |
| 17645509 | ppa020034m  | CYP93B    | 6      | -      | 232     | C         |                 | C    |              |
| 17645715 | ppa004404m  | CYP98A    | 1      | +      | 163     | C         |                 | C    |              |
| 17645828 | ppa004496m  | CYP714A   | 6      | -      | 400     | E         | short N         | C    |              |
| 17645872 | ppa023495m  | CYP82A    | 1      | -      | 211     | C         |                 | C    |              |
| 17645874 | ppa004414m  | CYP72X    | 1      | -      | 363     | C         |                 | C    |              |
| 17645889 | ppa004390m  | CYP71B    | 1      | -      | 123     | C         |                 | C    |              |
| 17645942 | ppa015526m  | CYP72A    | 4      | +      | 351     | E         | extra I         | c    | FS           |
| 17646105 | ppa025666m  | CYP716A   | 6      | -      | 34      | E         | extra E         | C    |              |
| 17646117 | ppa018082m  | CYP712A   | 2      | -      | 240     | C         |                 | c    | short N 3aa  |
| 17646196 | ppa024213m  | CYP78A    | 1      | -      | 271     | C         |                 | C    |              |
| 17646410 | ppa022359m  | CYP704A   | 2      | +      | 465     | C         |                 | C    |              |
| 17646594 | ppa019974m  |           | 2      | +      | 465     | P         | many defects    | P    | many defects |
| 17646693 | ppa003980m  | CYP89A    | 2      | +      | 287     | C         |                 | C    |              |
| 17646705 | ppa003405m  | CYP97B    | 3      | +      | 412     | C         |                 | C    |              |
| 17646731 | ppa004199m  | CYP89A    | 2      | +      | 287     | C         |                 | C    |              |
| 17647258 | ppa017795m  | CYP82C    | 1      | -      | 211     | P         | short N         | P    |              |
| 17647335 | ppa004034m  | CYP86A    | 2      | -      | 419     | C         |                 | C    |              |
| 17647395 | ppa004169m  | CYP82A    | 1      | -      | 211     | C         |                 | C    |              |
| 17647582 | ppa006310m  | CYP72A    | 4      | +      | 351     | E         | short N         | C    |              |
| 17647602 | ppa019218m  | CYP706A   | 5      | +      | 200     | E         | short N         | C    |              |
| 17647730 | ppa023100m  | CYP734A   | 1      | -      | 374     | E         | short N         | C    |              |
| 17647741 | ppa019068m  | CYP92A    | 2      | +      | 188     | C         |                 | C    |              |
| 17647755 | ppa017688m  | CYP71A?   | 5      | +      | 186     | E         | extra I         | c    | FS           |
| 17647775 | ppa018639m  | CYP735A   | 3      | -      | 387     | C         |                 | C    |              |
| 17647819 | ppa017772m  |           | 1      | -      | 0       | F         | 132aa           | F    |              |
| 17647937 | ppa004261m  | CYP71A    | 5      | -      | 119     | C         |                 | C    |              |
| 17647986 | ppa017053m  |           | 7      | +      | 0       | F         | 156aa           | F    |              |
| 17648032 | ppa024382m  | CYP87A    | 8      | -      | 62      | C         |                 | C    |              |
| 17648033 | ppa005020m  | CYP707A   | 6      | +      | 7       | C         |                 | C    |              |
| 17648154 | ppa005225m  | CYP716A   | 4      | -      | 37      | C         |                 | C    |              |
| 17648300 | ppa004999m  | CYP716A   | 4      | -      | 37      | C         |                 | C    |              |
| 17648302 | ppa018515m  |           | 6      | +      | 0       | F         | 180aa           | F    |              |
| 17648355 | ppa014656m  |           | 1      | +      | 0       | F         | 151aa           | F    |              |
| 17648436 | ppa1027202m | CYP710A   | 4      | -      | 470     | c         | 7aa short N     | C    |              |
| 17648601 | ppa005322m  | CYP706A   | 5      | +      | 194     | E         | short N         | C    |              |

|          |            |         |    |   |     |   |                  |   |              |
|----------|------------|---------|----|---|-----|---|------------------|---|--------------|
| 17648621 | ppa005465m | CYP725A | 6  | + | 20  | E | extra I          | C |              |
| 17648680 | ppa004329m | CYP734A | 1  | - | 374 | C |                  | C |              |
| 17648717 | ppa019886m | CYP81B  | 1  | + | 254 | E | extra I          | C |              |
| 17648736 | ppa024099m | CYP706A | 5  | + | 194 | E | short N          | C |              |
| 17648820 | ppa018268m | CYP76A  | 7  | - | 142 | C |                  | c | 1aa short N  |
| 17648862 | ppa023510m | CYP82C  | 8  | + | 223 | C |                  | C |              |
| 17648959 | ppa004947m | CYP704A | 2  | + | 461 | E | extra I          | C |              |
| 17649004 | ppa023299m | CYP76F  | 1  | + | 149 | E | long D           | c | FS           |
| 17649063 | ppa024021m | CYP81B  | 1  | - | 245 | E | short N; extra I | C |              |
| 17649198 | ppa005988m | CYP707A | 7  | + | 13  | E | missing E        | C |              |
| 17649311 | ppa019443m | CYP706A | 5  | + | 200 | E | short N          | E | extra I      |
| 17649531 | ppa004095m | CYP82G  | 8  | - | 222 | C |                  | C |              |
| 17649549 | ppa022722m |         | 1  | + | 249 | P |                  | P | FS           |
| 17649579 | ppa016446m | CYP72A  | 1  | - | 351 | C |                  | C |              |
| 17649969 | ppa024360m | CYP90D  | 3  | + | 50  | C |                  | C |              |
| 17650111 | ppa004988m | CYP716A | 1  | - | 26  | C |                  | C |              |
| 17650252 | ppa004639m | CYP77F  | 1  | + | 149 | C |                  | C |              |
| 17650355 | ppa017329m | CYP76F  | 1  | + | 149 | E | extra I          | C |              |
| 17650379 | ppa016822m | CYP722A | 1  | + | 2   | C |                  | C |              |
| 17650462 | ppa018839m | CYP71D  | 3  | + | 78  | c | 3aa short N      | C |              |
| 17650487 | ppa011895m |         | 1  | - | 0   | F | 192aa            | F |              |
| 17650575 | ppa021608m |         | 5  | + | 0   | F | 135aa            | F |              |
| 17650747 | ppa023634m |         | 1  | - | 0   | F | 312aa            | F |              |
| 17650776 | ppa005226m | CYP707A | 8  | - | 8   | C |                  | C |              |
| 17650839 |            |         | 4  | - | 0   | F | 74aa             | F |              |
| 17650968 | ppa004617m | CYP76F  | 1  | + | 149 | C |                  | C |              |
| 17650973 | ppa005500m | CYP725A | 6  | + | 20  | E | short N          | C |              |
| 17651200 | ppa026664m | CYP89A  | 5  | - | 304 | C |                  | C |              |
| 17651265 | ppa022977m | CYP71A  | 4  | - | 106 | P | many defects     | P | some defects |
| 17651273 | ppa026995m |         | 2  | - | 0   | F | 155aa            | F |              |
| 17651331 | ppa019918m |         | 2  | - | 0   | F | 303aa            | F |              |
| 17651416 | ppa022312m | CYP93A  | 7  | + | 225 | E | missing E x 2    | c | FS           |
| 17651466 | ppa016887m | CYP734A | 8  | + | 374 | C |                  | C |              |
| 17651481 | ppa005234m | CYP707A | 1  | + | 8   | C |                  | C |              |
| 17651573 | ppa021326m | CYP79D  | 6  | + | 314 | E | short N          | C |              |
| 17651808 | ppa019129m |         | 6  | - | 0   | F | 187aa            | F |              |
| 17651873 | ppa016904m | CYP704A | 2  | + | 465 | C |                  | C |              |
| 17651883 | ppa004175m | CYP83A  | 1  | - | 211 | C |                  | C |              |
| 17651909 | ppa004271m | CYP72A  | 4  | + | 351 | C |                  | C |              |
| 17652064 | ppa004356m | CYP89A  | 2  | + | 287 | C |                  | C |              |
| 17652232 | ppa022777m | CYP92A  | 7  | + | 173 | C |                  | C |              |
| 17652233 | ppa015528m |         | 1  | - | 0   | F | 219aa            | F |              |
| 17652304 | ppa017406m |         | 4  | - | 0   | F | 331aa            | F |              |
| 17652428 | ppa019048m | CYP92A  | 7  | + | 173 | C |                  | C |              |
| 17652470 | ppa015200m | CYP82C  | 1  | - | 215 | E | short N          | C |              |
| 17652600 |            |         | 1  | - | 0   | F | 102aa            | F |              |
| 17652612 | ppa026652m | CYP92A  | 4  | + | 188 | C |                  | C |              |
| 17652654 | ppa004503m | CYP76F  | 2  | - | 149 | C |                  | C |              |
| 17652656 | ppa026874m |         | 1  | - | 0   | F | 338aa            | F |              |
| 17652743 | ppa004664m | CYP92A  | 4  | - | 188 | C |                  | C |              |
| 17652852 | ppa027160m | CYP82C  | 3  | - | 211 | C |                  | C |              |
| 17652931 | ppa004467m | CYP94D  | 5  | - | 450 | C |                  | C |              |
| 17652968 | ppa026124m | CYP704A | 2  | + | 461 | C |                  | C |              |
| 17653004 |            |         | 8  | + | 0   | F | 178aa            | F |              |
| 17653014 | ppa016631m |         | 6  | - | 0   | F | 380aa            | F | G?           |
| 17653353 | ppa026596m |         | 1  | + | 0   | F | 86aa             | F |              |
| 17653792 | ppa015856m | CYP724A | 3  | - | 43  | E | short N          | C |              |
| 17654039 | ppa018745m | CYP87A  | 5  | + | 55  | E | extra I          | C |              |
| 17654058 | ppa004373m | CYP77A  | 2  | - | 284 | C |                  | C |              |
| 17654300 | ppa015948m |         | 1  | 0 | 0   | F | 130aa            | F |              |
| 17654330 | ppa012947m |         | 5  | - | 0   | F | 148aa            | F |              |
| 17654341 | ppa021340m |         | 6  | - | 0   | F | 185aa            | F |              |
| 17654437 | ppa003950m | CYP711  | 1  | + | 329 | C |                  | C |              |
| 17654549 |            |         | 3  | - | 0   | F | 131aa            | F |              |
| 17654756 |            |         | 6  | + | 0   | F | 144aa            | F |              |
| 17654762 | ppa017476m | CYP82C  | 1  | - | 215 | F | short N          | F | many defects |
| 17654770 | ppa004328m | CYP72B  | 1  | + | 374 | C |                  | C |              |
| 17654811 | ppa025865m |         | 8  | + | 0   | F | 332aa            | F |              |
| 17654823 | ppa004332m | CYP71A  | 5  | - | 106 | C |                  | C |              |
| 17654861 | ppa017915m | CYP724A | 1  | + | 351 | C |                  | E | short N      |
| 17654864 | ppa018687m | CYP712A | 7  | + | 241 | E | extra E          | C |              |
| 17654919 |            |         | 4  | - | 0   | F | 69aa             | F |              |
| 17654960 | ppa023521m | CYP79A  | 7  | - | 313 | E | short N          | C |              |
| 17655051 | ppa017888m |         | 34 | - | 0   | F | 194aa            | F |              |
| 17655150 | ppa004464m | CYP82C  | 1  | - | 211 | U | extra I?         | U | extra I?     |



|          |             |         |   |   |     |   |                   |     |                 |
|----------|-------------|---------|---|---|-----|---|-------------------|-----|-----------------|
| 17655171 | ppa018666m  | CYP71D  | 4 | - | 84  | E | short N           | C   |                 |
| 17655251 | ppa017849m  |         | 4 | - | 0   | F | 398aa             | F   |                 |
| 17655499 | ppa023262m  |         | 1 | - | 0   | F | 237aa             | F   |                 |
| 17655679 | ppa004343m  | CYP71B  | 1 | - | 123 | C |                   | C   |                 |
| 17655766 | ppa018902m  |         | 6 | + | 0   | F | 72aa              | F   |                 |
| 17655807 | ppa024660m  | CYP734A | 1 | + | 374 | C |                   | C   |                 |
| 17655862 | ppa005680m  | CYP722A | 7 | - | 3   | E | short N           | C   |                 |
| 17655902 | ppa020227m  | CYP86A  | 6 | - | 418 | E | extended N        | C   |                 |
| 17655981 | ppb022807m  |         | 1 | + | 0   | F | 255aa             | F   |                 |
| 17656111 | ppa005937m  | CYP88A  | 2 | - | 16  | E | short N           | C   |                 |
| 17656126 | ppa004319m  | CYP734A | 1 | - | 374 | C |                   | C   |                 |
| 17656205 | ppa003701m  | CYP97C  | 7 | + | 406 | C |                   | C   |                 |
| 17656241 | ppa005190m  | CYP71A  | 4 | + | 106 | E | extra I           | C   |                 |
| 17656265 | ppa017252m  | CYP94B  | 5 | + | 442 | E | short C           | C   |                 |
| 17656343 | ppa021443m  |         | 8 | + | 0   | F | 392aa             | F   |                 |
| 17656469 | ppa018047m  |         | 7 | + | 0   | F | 154aa             | F   |                 |
| 17656503 | ppa019849m  | CYP706A | 5 | + | 200 | C |                   | E   | short N         |
| 17656657 | ppa020167m  |         | 5 | + | 0   | F | 110aa             | F   |                 |
| 17656672 | ppa026438m  | CYP92A  | 7 | + | 173 | C |                   | C   |                 |
| 17656771 | ppa004331m  | CYP86B  | 1 | - | 424 | E | short N           | C   |                 |
| 17656776 | ppa020463m  | CYP71D  | 1 | - | 78  | E | short N           | C   |                 |
| 17656959 | ppa004635m  | CYP81E  | 6 | + | 255 | C |                   | C   |                 |
| 17657040 | ppa020002m  | CYP71A  | 5 | - | 121 | C |                   | C   |                 |
| 17657044 | ppa019660m  | CYP706A | 5 | + | 194 | C |                   | C   |                 |
| 17657054 | ppa021108m  | CYP72X  | 7 | - | 363 | E | wrong 5'end of E4 | C   |                 |
| 17657067 | ppa025166m  | CYP94C  | 7 | + | 438 | E | short N           | C   |                 |
| 17657069 | ppa004266m  | CYP714A | 6 | - | 401 | E | short N           | C   |                 |
| 17657151 | ppa003455m  | CYP97A  | 6 | - | 409 | E | lack E; extra I   | C   |                 |
| 17657235 | ppa004406m  | CYP98A  | 1 | + | 163 | C |                   | C   |                 |
| 17657264 | ppa005918m  | CYP82C  | 1 | - | 215 | E | short N           | C   |                 |
| 17657289 | ppa004646m  | CYP734A | 1 | - | 374 | E | long D            | c   | FS              |
| 17657351 | ppa004565m  | CYP90B  | 7 | + | 46  | C |                   | c   | 8aa short N     |
| 17657563 | ppa019215m  | CYP92A  | 7 | - | 173 | C |                   | C   |                 |
| 17657572 | ppa004474m  | CYP98A  | 1 | + | 163 | C |                   | C   |                 |
| 17657585 | ppa017288m  |         | 7 | + | 0   | F | 91aa              | F   |                 |
| 17657682 | ppa1027185m | CYP711A | 1 | - | 329 | C |                   | C   |                 |
| 17657947 | ppa1027205m | CYP714P | 7 | + | 399 | F | many defects      | F   | many defects    |
| 17657952 | ppa014661m  |         | 4 | - | 0   | F | 211aa             | F   |                 |
| 17657992 | ppa007545m  |         | 8 | + | 0   | F | 364aa             | F   |                 |
| 17658323 | ppa004179m  | CYP84A  | 1 | - | 211 | C |                   | C   |                 |
| 17658392 | ppa020637m  | CYP93A  | 7 | + | 225 | C |                   | C   |                 |
| 17658399 | ppa016050m  | CYP82G  | 8 | - | 222 | E | short N           | C   |                 |
| 17658496 | ppa019666m  | CYP87A  | 5 | + | 55  | C |                   | C   |                 |
| 17658543 | ppa023454m  | CYP724A | 3 | + | 43  | E | many defects      | E   | intron position |
| 17658574 | ppa023562m  |         | 7 | + | 0   | F |                   | 227 | F               |
| 17658874 |             |         | 1 | - | 0   | F | 84aa              | F   |                 |
| 17659036 | ppa016530m  |         | 4 | + | 0   | F | 194aa             | F   |                 |
| 17659037 | ppa004311m  | CYP94B  | 3 | - | 442 | C |                   | C   |                 |
| 17659053 | ppa016601m  |         | 5 | + | 374 | F |                   | F   | many defects    |
| 17659061 | ppa017401m  | CYP706A | 5 | + | 194 | C |                   | C   |                 |
| 17659069 | ppa025750m  | CYP93B  | 6 | + | 232 | C |                   | C   |                 |
| 17659173 | ppa024556m  | CYP71D  | 4 | - | 84  | c | 7aa short N       | C   |                 |
| 17659209 | ppa019787m  | CYP711  | 1 | - | 329 | C |                   | C   |                 |
| 17659229 | ppa016770m  | CYP72A  | 4 | + | 351 | E | extra I           | C   |                 |
| 17659467 | ppa026558m  | CYP88A  | 2 | + | 16  | E | extra E           | E   | extra E near C  |
| 17659547 | ppa025126m  | CYP71A  | 4 | + | 106 | E | extra I x 2       | C   |                 |
| 17659643 | ppa015701m  | CYP714A | 2 | + | 399 | c | 4aa short N       | C   |                 |
| 17659755 | ppa018530m  | CYP714A | 2 | + | 399 | C |                   | C   |                 |
| 17659866 | ppa014572m  | CYP92A  | 4 | - | 188 | C |                   | C   |                 |
| 17659957 | ppa023488m  | CYP725A | 4 | - | 21  | C |                   | C   |                 |
| 17660198 | ppa004449m  | CYP94A  | 8 | - | 447 | C |                   | C   |                 |
| 17660318 | ppa019965m  | CYP81E  | 6 | + | 255 | C |                   | C   |                 |
| 17660710 | ppa020499m  |         | 7 | + | 0   | F | 361aa             | F   |                 |
| 17660794 | ppa004910m  | CYP88A  | 2 | + | 16  | C |                   | C   |                 |
| 17660878 | ppa017951m  |         | 4 | + | 0   | F | 318aa             | F   |                 |
| 17661119 | ppa025196m  | CYP735A | 1 | + | 374 | C |                   | C   |                 |
| 17661131 | ppa020113m  |         | 2 | - | 0   | F | 141aa             | F   |                 |
| 17661246 | ppa004083m  | CYP78A  | 5 | + | 272 | C |                   | C   |                 |
| 17661320 | ppa004539m  | CYP721  | 1 | + | 385 | C |                   | C   |                 |
| 17661453 | ppa008535m  |         | 5 | + | 0   | F | 328aa             | F   |                 |
| 17661551 | ppa004268m  | CYP714A | 2 | - | 396 | C |                   | C   |                 |
| 17661757 | ppa004281m  | CYP706A | 5 | + | 194 | C |                   | C   |                 |
| 17661806 | ppa016042m  |         | 1 | - | 0   | F | 287aa             | F   |                 |
| 17662015 | ppa021901m  |         | 1 | + | 374 | P | long D            | P   | long D          |
| 17662021 | ppa026628m  | CYP92A  | 4 | - | 188 | C |                   | C   |                 |

|          |            |           |   |   |     |   |                   |      |
|----------|------------|-----------|---|---|-----|---|-------------------|------|
| 17662158 | ppa004341m | CYP714A   | 6 | - | 400 | C |                   | C    |
| 17662207 | ppa021147m | CYP76F    | 1 | + | 149 | E | short N           | C    |
| 17662274 | ppa016912m | CYP82C    | 1 | - | 215 | E | short N           | C    |
| 17662330 | ppa024670m | CYP71A    | 5 | - | 121 | C |                   | C    |
| 17662402 | ppa005870m | CYP71D    | 1 | - | 78  | E | short N           | C    |
| 17662502 | ppa024825m |           | 5 | + | 0   | F | 397aa             | F    |
| 17662527 | ppa025974m |           | 2 | - | 0   | F | 315a              | F    |
| 17662779 | ppa014596m | CYP92A    | 7 | - | 173 | E | extra I           | c FS |
| 17662905 |            |           | 6 | - | 0   | F | 117aa             | F    |
| 17662935 | ppa003468m | CYP727A   | 2 | + | 469 | C |                   | C    |
| 17662955 | ppa016466m | CYP82G    | 8 | - | 62  | E | wrong 5'end of E4 | C    |
| 17663193 | ppa024661m | CYP92A    | 7 | + | 225 | C |                   | C    |
| 17663261 | ppa024029m | CYP715A   | 2 | + | 394 | E | short N           | C    |
| 17663347 | ppa025296m | CYP81E    | 6 | + | 255 | C |                   | C    |
| 17663349 | ppa022979m | CYP76G    | 7 | - | 144 | C |                   | C    |
| 17663536 | ppa015174m |           | 1 | + | 0   | F | 153aa             | F    |
| 17663546 | ppa004768m | CYP90C    | 7 | + | 51  | c | short N 2aa       | C    |
| 17663708 | ppa004476m | CYP704A   | 2 | + | 461 | C |                   | C    |
| 17663771 | ppa023168m | CYP707A   | 8 | - | 1   | E | short N           | C    |
| 17663967 | ppa023035m |           | 2 | + | 0   | F | 194aa             | F    |
| 17664051 | ppa016261m | CYP72A    | 4 | + | 364 | E | many defects      | U    |
| 17664163 | ppa027023m | CYP88A    | 2 | + | 16  | C |                   | C    |
| 17664171 | ppa016800m | CYP734A   | 1 | - | 374 | E | short N           | C    |
| 17664453 | ppa023335m | CYP92A    | 7 | + | 173 | C |                   | C    |
| 17664458 |            |           | 1 | + | 0   | F | 207aa             | F    |
| 17664495 | ppa004152m | CYP71A    | 5 | + | 119 | C |                   | C    |
| 17664572 | ppa017619m | CYP93B    | 6 | - | 232 | C |                   | C    |
| 17664580 | ppa017339m | CYP71A    | 5 | - | 119 | C |                   | C    |
| 17664597 | ppa025083m | CYP71A    | 4 | + | 106 | E | extra I           | c FS |
| 17664651 | ppa021548m |           | 6 | + | 0   | F | 209aa             | F    |
| 17664725 | ppa015645m |           | 1 | + | 0   | F | 181aa             | F    |
| 17664728 | ppa004149m | CYP714A   | 2 | + | 399 | C |                   | C    |
| 17664929 | ppa026707m |           | 6 | + | 0   | F | 242aa             | F    |
| 17664985 | ppa023213m | CYP76A    | 7 | - | 142 | E | extra I x 2       | c FS |
| 17665004 | ppa006307m | CYP72A    | 4 | + | 351 | E | missing E         | C    |
| 17665119 | ppa026605m | CYP79A    | 7 | - | 313 | E | short N           | C    |
| 17665137 | ppa026417m |           | 1 | + | 0   | F | 92aa              | F    |
| 17665290 | ppa004298m |           | 1 | - | 453 | E | short N; extra C  | C    |
| 17665457 |            |           | 6 | - | 0   | F | 68aa              | F    |
| 17665472 | ppa005060m | CYP90A    | 2 | + | 47  | C |                   | C    |
| 17665595 | ppa024077m | CYP71A    | 4 | + | 106 | E | extra I           | c FS |
| 17665598 | ppa022174m | CYP82A    | 1 | - | 211 | C |                   | C    |
| 17665760 | ppa022752m | CYP82A    | 1 | - | 374 | E | short N           | C    |
| 17665784 | ppa026638m |           | 1 | + | 0   | F | 254aa             | F    |
| 17665907 | ppa020783m |           | 1 | - | 0   | F | 334aa             | F    |
| 17665942 | ppa017987m | CYP81E    | 6 | + | 255 | E | extra I; short C  | C    |
| 17665951 | ppa020957m | CYP724A   | 3 | - | 43  | C |                   | C    |
| 17666006 | ppa025192m |           | 1 | - | 0   | F | 70a               | F    |
| 17666016 | ppa026390m |           | 4 | - | 0   | F | 373aa             | F    |
| 17666021 | ppa025696m | CYP71D    | 4 | - | 71  | E | short C           | c FS |
| 17666096 | ppa004301m | CYP82C    | 8 | + | 223 | C |                   | C    |
| 17666272 | ppa017479m | CYP71D    | 4 | - | 71  | E | many defects      | C    |
| 17666294 | ppa021021m |           | 1 | + | 0   | F | 239aa             | F    |
| 17666318 |            | AGE       | 5 | - | 0   | X | 423aa             | X    |
| 17666877 | ppa004901m | CYP88A    | 2 | - | 16  | C |                   | C    |
| 17666896 | ppa019933m | CYP86C    | 1 | + | 425 | C |                   | C    |
| 17666907 | ppa004517m | CYP99A    | 1 | + | 149 | C |                   | C    |
| 17667063 | ppa019731m | CYP82C    | 6 | - | 214 | E | short N           | C    |
| 17667246 | ppa026871m | CYP78A    | 1 | + | 272 | C |                   | C    |
| 17667258 | ppa026692m | CYP81E    | 6 | + | 255 | E | extra I           | C    |
| 17667471 | ppa022621m | CYP374A   | 1 | + | 374 | c | 8aa short N       | C    |
| 17667486 | ppa016799m |           | 5 | - | 0   | F | 192aa             | F    |
| 17667725 | ppa016144m | CYP98A    | 5 | + | 167 | C |                   | C    |
| 17667852 | ppa025066m | CYP71D    | 4 | - | 71  | C |                   | C    |
| 17668013 | ppa004984m |           | 4 | + | 0   | U | 100N              | U    |
| 17668213 | ppa004436m | CYP92A    | 3 | + | 174 | C |                   | C    |
| 17668232 | ppa023786m | CYP81E    | 6 | + | 255 | C |                   | C    |
| 17668327 | ppa019549m |           | 5 | + | 0   | F | 289aa             | F    |
| 17668446 | ppa004495m | CYP704A   | 2 | - | 461 | C |                   | C    |
| 17668474 | ppa004433m | CYP75B    | 5 | - | 161 | C |                   | C    |
| 17668526 | ppa002142m | reductase | 1 | + | 477 | X |                   | X    |
| 17668529 | ppa004463m | CYP72B1   | 1 | + | 374 | C |                   | C    |
| 17668564 | ppa004579m | CYP704A   | 2 | + | 456 | C |                   | C    |
| 17668595 | ppa021318m |           | 6 | + | 0   | F | 400aa             | F    |
| 17668713 | ppa004473m | CYP98A    | 1 | + | 163 | C |                   | C    |

|          |            |         |   |   |     |   |         |   |
|----------|------------|---------|---|---|-----|---|---------|---|
| 17668998 | ppa017753m | CYP718  | 3 | + | 42  | E | short N | C |
| 17669024 | ppa003868m | CYP78A  | 8 | + | 269 | C |         | C |
| 17669152 | ppa022041m | CYP92A  | 6 | - | 188 | C |         | C |
| 17669173 | ppa004377m | CYP71A  | 5 | + | 186 | E | extra I | C |
| 17669299 | ppa003821m | CYP51   | 1 | + | 323 | E | extra N | C |
| 17669344 | ppa016810m | CYP703A | 2 | - | 320 | E | short N | C |

|             |       | Peach Phytozome |   | Peach Refgs |  |
|-------------|-------|-----------------|---|-------------|--|
| Correct     | C     | 136             | C | 200         |  |
| Nearly good | c     | 6               | c | 14          |  |
| Uncertain   | U     | 2               | U | 3           |  |
| Error       | E     | 78              | E | 5           |  |
| Pseudogene  | P     | 5               | P | 5           |  |
| Filtered    | F     | 73              | F | 73          |  |
| Non P450    | X     | 3               | X | 3           |  |
|             | Total | 303             |   | 303         |  |

reductase      Cytochrome P450 reductase  
AGE              l-Ala-D/L-Glu epimerase-like

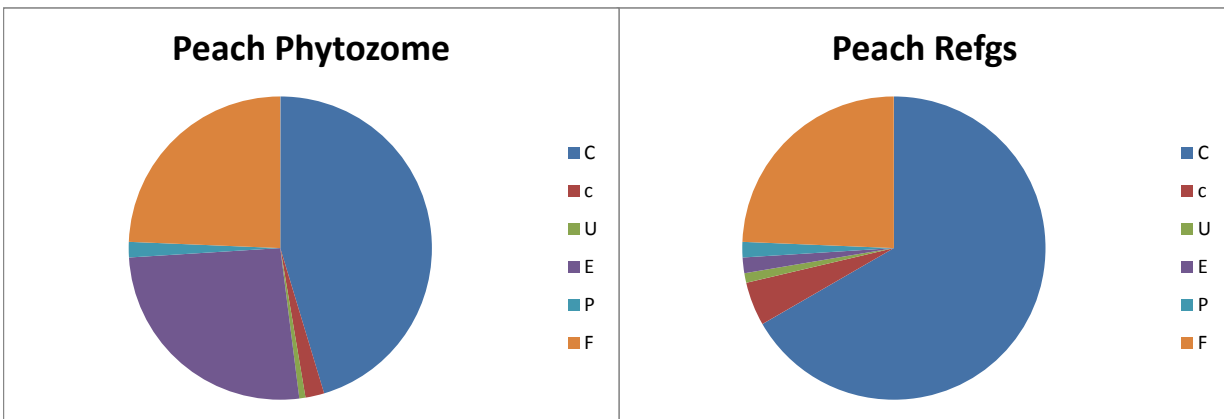

Table S2B Manual Assessment of Maize P450 Genes

| KOG-PID  | Subfamily | Chrom | Strand | Cluster | Phytozome | Comment   | Refgs | Comment     |
|----------|-----------|-------|--------|---------|-----------|-----------|-------|-------------|
| 20861891 | CYP709B   | 1     | +      | 391     | C         |           | C     |             |
| 20862038 | CYP071xn  | 1     | +      | 99      | P         | short C   | P     | extra E     |
| 20862133 | CYP078a   | 1     | +      | 279     | C         |           | C     |             |
| 20862210 | CYP081b   | 1     | +      | 267     | C         |           | C     |             |
| 20862211 | CYP081e   | 1     | +      | 0       | F         |           | F     |             |
| 20862212 | CYP081e   | 1     | +      | 0       | F         |           | F     |             |
| 20862316 | CYP076f   | 1     | +      | 0       | F         |           | F     |             |
| 20862635 | CYP092a   | 1     | +      | 180     | E         | short C   | c     | FS          |
| 20862842 | CYP97C    | 1     | +      | 406     | E         | truncated | C     |             |
| 20862843 | CYP97C    | 1     | +      | 0       | F         |           | F     |             |
| 20863960 | CYP709B   | 1     | +      | 392     | C         |           | C     |             |
| 20864334 | CYP085a   | 1     | +      | 52      | C         |           | C     |             |
| 20864806 | CYP081b   | 1     | +      | 267     | C         |           | C     |             |
| 20864817 | CYP081b   | 1     | +      | 267     | C         |           | C     |             |
| 20865126 | CYP071j   | 1     | +      | 92      | C         |           | C     |             |
| 20865138 | CYP078a   | 1     | +      | 269     | C         |           | c     | 2aa shor N  |
| 20865139 | CYP078a   | 1     | +      | 0       | F         |           | F     |             |
| 20865679 | CYP87A    | 1     | +      | 0       | F         |           | F     |             |
| 20866187 | CYP709B   | 1     | +      | 392     | C         |           | C     |             |
| 20866772 | CYP706a   | 1     | +      | 197     | C         |           | C     |             |
| 20867226 | CYP071j   | 1     | +      | 90      | C         |           | C     |             |
| 20868683 | CYP084a   | 1     | +      | 185     | C         |           | C     |             |
| 20868809 | CYP20D    | 1     | +      | 436     | C         |           | C     |             |
| 20868976 | CYP099a   | 1     | +      | 191     | C         |           | C     |             |
| 20868977 | CYP099a   | 1     | +      | 0       | F         |           | F     |             |
| 20869162 | CYP86B    | 1     | +      | 424     | C         |           | C     |             |
| 20869439 | CYP092a   | 1     | +      | 180     | C         |           | C     |             |
| 20869610 | CYP081b   | 1     | +      | 267     | C         |           | C     |             |
| 20869665 | CYP94D    | 1     | +      | 451     | C         |           | C     |             |
| 20869793 | CYP081b   | 1     | +      | 267     | C         |           | C     |             |
| 20869898 | CYP074a   | 1     | +      | 467     | C         |           | C     |             |
| 20869899 | CYP074a   | 1     | +      | 0       | F         |           | F     |             |
| 20871007 | CYP071e   | 1     | +      | 132     | C         |           | C     |             |
| 20861868 | CYP86A    | 1     | -      | 0       | F         |           | F     |             |
| 20862296 | CYP074a   | 1     | -      | 467     | C         |           | C     |             |
| 20862565 | CYP076f   | 1     | -      | 172     | E         | short C   | c     | FS          |
| 20863233 | CYP081b   | 1     | -      | 268     | E         | extra I   | C     |             |
| 20863430 | CYP704B   | 1     | -      | 453     | C         |           | C     |             |
| 20863749 | CYP071x   | 1     | -      | 96      | C         |           | C     |             |
| 20863837 | CYP074a   | 1     | -      | 467     | C         |           | C     |             |
| 20864094 | CYP714A   | 1     | -      | 397     | C         |           | C     |             |
| 20864338 | CYP090b   | 1     | -      | 46      | C         |           | c     | 4aa short N |
| 20864339 | CYP090b   | 1     | -      | 0       | F         |           | F     |             |
| 20864340 | CYP090b   | 1     | -      | 0       | F         |           | F     |             |
| 20864341 | CYP090b   | 1     | -      | 0       | F         |           | F     |             |
| 20865193 | CYP89A    | 1     | -      | 300     | c         | long N    | c     | short N     |
| 20865194 | CYP89A    | 1     | -      | 0       | F         |           | F     |             |
| 20865195 | CYP89A    | 1     | -      | 0       | F         |           | F     |             |
| 20865850 | CYP20D    | 1     | -      | 436     | C         |           | C     |             |
| 20866364 | CYP071x   | 1     | -      | 96      | C         |           | C     |             |
| 20866385 | CYP94D    | 1     | -      | 451     | C         |           | C     |             |
| 20866403 | CYP088a   | 1     | -      | 66      | C         |           | C     |             |
| 20866578 | CYP078a   | 1     | -      | 281     | C         |           | C     |             |
| 20866622 | CYP081b   | 1     | -      | 0       | F         |           | F     |             |
| 20867075 | CYP96A    | 1     | -      | 0       | F         |           | F     |             |
| 20867248 | CYP076f   | 1     | -      | 158     | C         |           | C     |             |
| 20867287 | CYP085a   | 1     | -      | 52      | P         | too long  | P     | too short   |
| 20867289 | CYP081b   | 1     | -      | 267     | C         |           | C     |             |
| 20867576 | CYP078a   | 1     | -      | 273     | C         |           | C     |             |
| 20867577 | CYP078a   | 1     | -      | 0       | F         |           | F     |             |
| 20867578 | CYP078a   | 1     | -      | 0       | F         |           | F     |             |
| 20867950 | CYP704A   | 1     | -      | 460     | C         |           | C     |             |
| 20868491 | CYP079a   | 1     | -      | 318     | C         |           | E     | I1 position |
| 20869229 | CYP707A   | 1     | -      | 0       | F         |           | F     |             |
| 20869734 | CYP081b   | 1     | -      | 268     | C         |           | C     |             |
| 20869762 | CYP709B   | 1     | -      | 0       | F         |           | F     |             |
| 20869831 | CYP707a   | 1     | -      | 1       | C         |           | C     |             |
| 20869832 | CYP707a   | 1     | -      | 0       | F         |           | F     |             |
| 20871474 | CYP071xn  | 1     | -      | 92      | C         |           | C     |             |
| 20871476 | CYP89A    | 1     | -      | 0       | F         |           | F     |             |
| 20841659 | CYP714A   | 2     | +      | 397     | C         |           | C     |             |
| 20841660 | CYP714A   | 2     | +      | 0       | F         |           | F     |             |
| 20841661 | CYP714A   | 2     | +      | 0       | F         |           | F     |             |
| 20841662 | CYP714A   | 2     | +      | 0       | F         |           | F     |             |
| 20841738 | CYP727a   | 2     | +      | 469     | C         |           | C     |             |
| 20841754 | CYP092a   | 2     | +      | 175     | C         |           | C     |             |
| 20842664 | CYP071c   | 2     | +      | 102     | C         |           | C     |             |
| 20843216 | CYP051a   | 2     | +      | 327     | C         |           | C     |             |
| 20843217 | CYP051a   | 2     | +      | 0       | F         |           | F     |             |

|          |           |   |   |     |   |                 |   |                  |
|----------|-----------|---|---|-----|---|-----------------|---|------------------|
| 20843487 | reductase | 2 | + | 475 | C |                 | C |                  |
| 20843488 | CYP102a   | 2 | + | 0   | F |                 | F |                  |
| 20843759 | CYP092a   | 2 | + | 182 | C |                 | E | short N, short C |
| 20843948 | CYP071a   | 2 | + | 121 | C |                 | E | extra E          |
| 20844027 | CYP071a   | 2 | + | 98  | C |                 | C |                  |
| 20844765 | CYP090a   | 2 | + | 48  | C |                 | C |                  |
| 20845128 | CYP071j   | 2 | + | 88  | C |                 | c | 5aa short N      |
| 20845355 | CYP725a   | 2 | + | 22  | C |                 | C |                  |
| 20846847 | CYP071a   | 2 | + | 98  | C |                 | C |                  |
| 20846848 | CYP071a   | 2 | + | 0   | F |                 | F |                  |
| 20846998 | CYP86A    | 2 | + | 422 | E | extra N         | C |                  |
| 20846999 | CYP86A    | 2 | + | 0   | F |                 | F |                  |
| 20847000 | CYP86A    | 2 | + | 0   | F |                 | F |                  |
| 20847595 | CYP704A   | 2 | + | 459 | C |                 | C |                  |
| 20848671 | CYP709B   | 2 | + | 392 | C |                 | C |                  |
| 20842668 | CYP092a   | 2 | - | 180 | c | long N          | c | short N          |
| 20842772 | CYP078a   | 2 | - | 279 | C |                 | C |                  |
| 20843195 | CYP94B    | 2 | - | 446 | c | long N          | c | short N          |
| 20843196 | CYP94B    | 2 | - | 0   | F |                 | F |                  |
| 20843229 | CYP89A    | 2 | - | 306 | C |                 | C |                  |
| 20843559 | CYP081b   | 2 | - | 267 | C |                 | C |                  |
| 20843807 | CYP092a   | 2 | - | 180 | U | short C         | U | E2?              |
| 20844064 | CYP092a   | 2 | - | 0   | F |                 | F |                  |
| 20845006 | CYP89A    | 2 | - | 0   | F |                 | F |                  |
| 20845470 | CYP89A    | 2 | - | 0   | F |                 | F |                  |
| 20845572 | CYP098a   | 2 | - | 0   | F |                 | F |                  |
| 20845605 | CYP724A   | 2 | - | 43  | C |                 | c | 4aa short N      |
| 20845632 | CYP709B   | 2 | - | 392 | C |                 | C |                  |
| 20846126 | CYP092a   | 2 | - | 180 | C |                 | C |                  |
| 20846478 | CYP071xn  | 2 | - | 0   | F |                 | F |                  |
| 20846789 | CYP071xn  | 2 | - | 99  | E | too long        | C |                  |
| 20846790 | CYP071xn  | 2 | - | 0   | F |                 | F |                  |
| 20847212 | CYP071xn  | 2 | - | 99  | c | long N          | c | short N          |
| 20847225 | CYP707a   | 2 | - | 12  | E | long E3         | C |                  |
| 20847632 | CYP77A    | 2 | - | 285 | c | long N          | c | short N          |
| 20848411 | CYP071xn  | 2 | - | 99  | C |                 | C |                  |
| 20849062 | CYP071xn  | 2 | - | 94  | C |                 | C |                  |
| 20825119 | CYP89A    | 3 | + | 0   | F |                 | F |                  |
| 20825320 | CYP89A    | 3 | + | 0   | F |                 | F |                  |
| 20826380 | CYP706a   | 3 | + | 197 | C | short N         | C |                  |
| 20826447 | CYP098a   | 3 | + | 164 | C |                 | C |                  |
| 20826448 | CYP098a   | 3 | + | 0   | F |                 | F |                  |
| 20826449 | CYP098a   | 3 | + | 0   | F |                 | F |                  |
| 20826450 | CYP098a   | 3 | + | 0   | F |                 | F |                  |
| 20826451 | CYP098a   | 3 | + | 0   | F |                 | F |                  |
| 20826839 | CYP89A    | 3 | + | 305 | C |                 | C |                  |
| 20827143 | CYP005a   | 3 | + | 331 | E | short N         | C |                  |
| 20828808 | CYP734A   | 3 | + | 383 | C |                 | C |                  |
| 20828809 | CYP734A   | 3 | + | 0   | F |                 | F |                  |
| 20830181 | CYP072x   | 3 | + | 357 | C |                 | C |                  |
| 20830182 | CYP072x   | 3 | + | 0   | F |                 | F |                  |
| 20830183 | CYP072x   | 3 | + | 0   | F |                 | F |                  |
| 20830970 | CYP094a   | 3 | + | 452 | C |                 | C |                  |
| 20831245 | CYP051a   | 3 | + | 323 | C |                 | C |                  |
| 20831246 | CYP051a   | 3 | + | 0   | F |                 | F |                  |
| 20831357 | CYP072x   | 3 | + | 0   | F |                 | F |                  |
| 20831429 | CYP003a   | 3 | + | 0   | F |                 | F |                  |
| 20831431 | CYP710A   | 3 | + | 470 | C |                 | E | short N          |
| 20831571 | AGE       | 3 | + | 473 | X |                 | X |                  |
| 20831572 | CYP513F   | 3 | + | 0   | F |                 | F |                  |
| 20825778 | CYP051a   | 3 | - | 327 | c | long N          | c | short N          |
| 20826398 | CYP709B   | 3 | - | 393 | C |                 | C |                  |
| 20826581 | CYP072x   | 3 | - | 357 | C |                 | C |                  |
| 20826582 | CYP072x   | 3 | - | 0   | F |                 | F |                  |
| 20828298 | CYP072x   | 3 | - | 0   | F |                 | F |                  |
| 20829114 | CYP072x   | 3 | - | 360 | C |                 | C |                  |
| 20829155 | CYP071j   | 3 | - | 90  | E | exon 1, short C | C |                  |
| 20829156 | CYP071j   | 3 | - | 0   | F |                 | F |                  |
| 20829812 | CYP94C    | 3 | - | 441 | C |                 | C |                  |
| 20830676 | CYP086a   | 3 | - | 418 | C |                 | E | short C          |
| 20831103 | CYP071a   | 3 | - | 97  | C |                 | C |                  |
| 20831331 | CYP90D    | 3 | - | 50  | C |                 | C |                  |
| 20831332 | CYP90D    | 3 | - | 0   | F |                 | F |                  |
| 20831483 | CYP072x   | 3 | - | 359 | C |                 | C |                  |
| 20831484 | CYP072x   | 3 | - | 0   | F |                 | F |                  |
| 20831551 | CYP072x   | 3 | - | 360 | C |                 | C |                  |
| 20831552 | CYP072x   | 3 | - | 0   | F |                 | F |                  |
| 20855236 | CYP714A   | 4 | + | 0   | F |                 | F |                  |
| 20856296 | CYP071j   | 4 | + | 90  | C |                 | C |                  |
| 20856392 | CYP716A   | 4 | + | 23  | C |                 | C |                  |
| 20856684 | CYP071j   | 4 | + | 94  | C |                 | C |                  |
| 20857681 | CYP092a   | 4 | + | 178 | c | long N          | c | short N          |

|          |           |   |   |     |   |            |   |                           |
|----------|-----------|---|---|-----|---|------------|---|---------------------------|
| 20858029 | CYP89A    | 4 | + | 307 | C |            | C |                           |
| 20858857 | CYP051a   | 4 | + | 324 | C |            | C |                           |
| 20858993 | CYP071c   | 4 | + | 101 | c | long N     | c | short N                   |
| 20858994 | CYP071c   | 4 | + | 0   | F |            | F |                           |
| 20859035 | CYP005a   | 4 | + | 332 | U | E3         | U | E3                        |
| 20859036 | CYP6AG    | 4 | + | 0   | F |            | F |                           |
| 20859704 | CYP707a   | 4 | + | 6   | C |            | C |                           |
| 20859705 | CYP707a   | 4 | + | 0   | F |            | F |                           |
| 20859921 | CYP071c   | 4 | + | 103 | C |            | C |                           |
| 20859964 | CYP97C    | 4 | + | 0   | F |            | F |                           |
| 20860740 | reductase | 4 | + | 482 | X |            | X |                           |
| 20860984 | CYP89A    | 4 | + | 303 | C |            | C |                           |
| 20861088 | reductase | 4 | + | 475 | C |            | C |                           |
| 20861311 | CYP081b   | 4 | + | 267 | c | long N     | c | short N                   |
| 20854891 | CYP090a   | 4 | - | 48  | C |            | C |                           |
| 20854892 | CYP090a   | 4 | - | 0   | F |            | F |                           |
| 20854893 | CYP090a   | 4 | - | 0   | F |            | F |                           |
| 20854894 | CYP090a   | 4 | - | 0   | F |            | F |                           |
| 20855588 | CYP078a   | 4 | - | 279 | C |            | C |                           |
| 20855748 | CYP715A   | 4 | - | 394 | C |            | C |                           |
| 20856144 | CYP75B    | 4 | - | 162 | E | many E     | C |                           |
| 20856145 | CYP075b   | 4 | - | 0   | F |            | F |                           |
| 20856439 | CYP20D    | 4 | - | 436 | C |            | C |                           |
| 20857860 | CYP071c   | 4 | - | 103 | C |            | C |                           |
| 20858061 | CYP071c   | 4 | - | 103 | E | extra E    | C |                           |
| 20858062 | CYP071c   | 4 | - | 0   | F |            | F |                           |
| 20858063 | CYP071c   | 4 | - | 0   | F |            | F |                           |
| 20858064 | CYP071c   | 4 | - | 0   | F |            | F |                           |
| 20858065 | CYP071c   | 4 | - | 0   | F |            | F |                           |
| 20858123 | CYP074a   | 4 | - | 467 | C |            | C |                           |
| 20858525 | CYP071j   | 4 | - | 88  | C |            | C |                           |
| 20858526 | CYP071j   | 4 | - | 0   | F |            | F |                           |
| 20858877 | CYP86C    | 4 | - | 425 | C |            | E | extra E                   |
| 20858878 | CYP86C    | 4 | - | 0   | F |            | F |                           |
| 20858957 | CYP94B    | 4 | - | 446 | C |            | C |                           |
| 20859127 | CYP071a   | 4 | - | 243 | C |            | E | I1 position, extra intron |
| 20859586 | CYP071j   | 4 | - | 94  | E | short N    | C |                           |
| 20860022 | CYP099a   | 4 | - | 191 | C |            | C |                           |
| 20860249 | CYP099a   | 4 | - | 191 | C |            | C |                           |
| 20860251 | CYP075b   | 4 | - | 162 | C |            | C |                           |
| 20860448 | CYP89A    | 4 | - | 307 | c | long N     | c | short N                   |
| 20860477 | CYP707a   | 4 | - | 14  | C |            | E | extra I                   |
| 20860478 | CYP707a   | 4 | - | 0   | F |            | F |                           |
| 20860886 | CYP735A   | 4 | - | 388 | E | missing E1 | C |                           |
| 20860938 | CYP097b   | 4 | - | 412 | C |            | C |                           |
| 20860939 | CYP097b   | 4 | - | 0   | F |            | F |                           |
| 20877138 | CYP071d   | 5 | + | 93  | C |            | C |                           |
| 20877773 | CYP071j   | 5 | + | 88  | E | short C    | c | FS                        |
| 20877774 | CYP071j   | 5 | + | 0   | F |            | F |                           |
| 20878227 | CYP734A   | 5 | + | 383 | E | retained I | C |                           |
| 20878266 | CYP073a   | 5 | + | 207 | c | long N     | c | short N                   |
| 20878439 | CYP87A    | 5 | + | 56  | C |            | E | extra NE                  |
| 20879413 | CYP94B    | 5 | + | 0   | F |            | F |                           |
| 20879434 | CYP079a   | 5 | + | 318 | C |            | C |                           |
| 20880195 | CYP97C    | 5 | + | 0   | F |            | F |                           |
| 20880786 | CYP084a   | 5 | + | 185 | C |            | C |                           |
| 20880856 | CYP071j   | 5 | + | 88  | C |            | C |                           |
| 20881054 | CYP076f   | 5 | + | 158 | C |            | C |                           |
| 20881436 | CYP87A    | 5 | + | 63  | C |            | C |                           |
| 20881481 | CYP071j   | 5 | + | 91  | C |            | C |                           |
| 20881482 | CYP071j   | 5 | + | 0   | F |            | F |                           |
| 20881975 | CYP86B    | 5 | + | 424 | C |            | c | 4aa short N               |
| 20882219 | CYP77B    | 5 | + | 286 | C |            | C |                           |
| 20882339 | CYP87A    | 5 | + | 0   | F |            | F |                           |
| 20882386 | CYP074a   | 5 | + | 467 | C |            | C |                           |
| 20876354 | CYP071d   | 5 | - | 93  | C |            | C |                           |
| 20876475 | CYP071j   | 5 | - | 92  | c | long N     | c | short N                   |
| 20877274 | CYP89A    | 5 | - | 300 | C |            | C |                           |
| 20877539 | CYP86A    | 5 | - | 422 | C |            | C |                           |
| 20878287 | CYP725a   | 5 | - | 24  | C |            | C |                           |
| 20878711 | CYP081b   | 5 | - | 267 | C |            | C |                           |
| 20878781 | CYP075b   | 5 | - | 162 | C |            | C |                           |
| 20879184 | CYP081b   | 5 | - | 267 | C |            | C |                           |
| 20879876 | CYP071j   | 5 | - | 91  | E | short N    | C |                           |
| 20879960 | CYP97A    | 5 | - | 410 | C |            | C |                           |
| 20881730 | CYP89A    | 5 | - | 305 | E | short N    | C |                           |
| 20881918 | CYP081b   | 5 | - | 267 | C |            | C |                           |
| 20882387 | CYP093a   | 5 | - | 233 | E | short C    | C |                           |
| 20882764 | CYP707a   | 5 | - | 6   | C |            | C |                           |
| 20882765 | CYP707a   | 5 | - | 0   | F |            | F |                           |
| 20883328 | CYP079a   | 5 | - | 318 | C |            | C |                           |
| 20820934 | CYP94C    | 6 | + | 441 | C |            | C |                           |

|          |           |   |   |     |   |   |                   |
|----------|-----------|---|---|-----|---|---|-------------------|
| 20821377 | CYP071xn  | 6 | + | 100 | C | C |                   |
| 20821686 | CYP094a   | 6 | + | 452 | C | C |                   |
| 20821801 | CYP89A    | 6 | + | 307 | C | c | 6aa short N       |
| 20822852 | CYP098a   | 6 | + | 164 | C | C |                   |
| 20823436 | CYP071xn  | 6 | + | 100 | C | E | extra last intron |
| 20823568 | CYP073a   | 6 | + | 207 | C | C |                   |
| 20824162 | CYP20D    | 6 | + | 466 | C | C |                   |
| 20824284 | CYP714A   | 6 | + | 0   | F | F |                   |
| 20820309 | CYP071j   | 6 | - | 89  | C | C |                   |
| 20820629 | CYP709B   | 6 | - | 392 | C | C |                   |
| 20820922 | CYP004a   | 6 | - | 0   | F | F |                   |
| 20822302 | CYP704A   | 6 | - | 464 | C | C |                   |
| 20822813 | CYP90D    | 6 | - | 50  | C | C |                   |
| 20823056 | CYP071j   | 6 | - | 88  | C | C |                   |
| 20823861 | CYP709B   | 6 | - | 392 | C | E | extra last intron |
| 20832176 | CYP071a   | 7 | + | 98  | C | C |                   |
| 20832510 | CYP709B   | 7 | + | 0   | F | F |                   |
| 20832598 | CYP709B   | 7 | + | 392 | C | C |                   |
| 20833544 | reductase | 7 | + | 475 | C | C |                   |
| 20834344 | CYP078a   | 7 | + | 273 | C | C |                   |
| 20835393 | CYP97A    | 7 | + | 0   | F | F |                   |
| 20836509 | CYP092a   | 7 | + | 175 | C | C |                   |
| 20831976 | CYP734A   | 7 | - | 384 | C | C |                   |
| 20832042 | CYP725a   | 7 | - | 22  | C | C |                   |
| 20833130 | CYP707a   | 7 | - | 12  | C | C |                   |
| 20833131 | CYP707a   | 7 | - | 0   | F | F |                   |
| 20833132 | CYP707a   | 7 | - | 0   | F | F |                   |
| 20833532 | CYP735A   | 7 | - | 388 | C | C |                   |
| 20833533 | CYP735A   | 7 | - | 0   | F | F |                   |
| 20833602 | CYP076f   | 7 | - | 170 | C | C |                   |
| 20834139 | CYP092a   | 7 | - | 182 | C | C |                   |
| 20834884 | CYP081b   | 7 | - | 267 | C | C |                   |
| 20835484 | CYP076f   | 7 | - | 172 | E | c | lack E1<br>N end  |
| 20849347 | CYP071x   | 8 | + | 0   | F | F |                   |
| 20849732 | CYP704A   | 8 | + | 459 | E | C | short N           |
| 20850107 | CYP071a   | 8 | + | 97  | C | C |                   |
| 20850684 | CYP071a   | 8 | + | 97  | C | C |                   |
| 20850910 | CYP071a   | 8 | + | 97  | C | C |                   |
| 20851408 | CYP072x   | 8 | + | 0   | F | F |                   |
| 20851488 | CYP082a   | 8 | + | 346 | C | C |                   |
| 20851541 | CYP96A    | 8 | + | 0   | F | F |                   |
| 20851717 | CYP071a   | 8 | + | 0   | F | F |                   |
| 20851920 | CYP94C    | 8 | + | 441 | C | C |                   |
| 20852050 | CYP071a   | 8 | + | 97  | C | C |                   |
| 20852951 | CYP072x   | 8 | + | 359 | C | C |                   |
| 20853056 | CYP722A   | 8 | + | 2   | U | U |                   |
| 20853057 | CYP722A   | 8 | + | 0   | F | F |                   |
| 20853070 | CYP072x   | 8 | + | 358 | C | C |                   |
| 20853283 | CYP073a   | 8 | + | 207 | C | C |                   |
| 20853311 | CYP20D    | 8 | + | 436 | C | C |                   |
| 20853312 | CYP96A    | 8 | + | 0   | F | F |                   |
| 20853386 | CYP86B    | 8 | + | 0   | F | F |                   |
| 20853732 | CYP072x   | 8 | + | 358 | C | C |                   |
| 20853746 | CYP075b   | 8 | + | 162 | C | C |                   |
| 20849226 | CYP081b   | 8 | - | 267 | C | C |                   |
| 20849227 | CYP081b   | 8 | - | 0   | F | F |                   |
| 20849588 | CYP86C    | 8 | - | 0   | F | F |                   |
| 20849901 | CYP709B   | 8 | - | 392 | C | C |                   |
| 20850447 | AGE       | 8 | - | 473 | X | X |                   |
| 20850987 | CYP051a   | 8 | - | 327 | C | C |                   |
| 20851000 | CYP89A    | 8 | - | 303 | C | C |                   |
| 20851164 | CYP072x   | 8 | - | 357 | E | C | extra E           |
| 20851165 | CYP072x   | 8 | - | 0   | F | F |                   |
| 20851166 | CYP072x   | 8 | - | 0   | F | F |                   |
| 20851811 | CYP073a   | 8 | - | 207 | C | C |                   |
| 20851954 | CYP072x   | 8 | - | 359 | C | C |                   |
| 20852021 | CYP086a   | 8 | - | 418 | C | E | short C           |
| 20836969 | CYP20D    | 9 | + | 436 | C | C |                   |
| 20837064 | CYP088a   | 9 | + | 17  | C | c | 5aa short N       |
| 20837272 | CYP093a   | 9 | + | 233 | C | C |                   |
| 20837471 | CYP704A   | 9 | + | 0   | F | F |                   |
| 20837538 | CYP071x   | 9 | + | 0   | F | F |                   |
| 20839040 | CYP075a   | 9 | + | 0   | F | F |                   |
| 20839283 | CYP734A   | 9 | + | 383 | C | C |                   |
| 20840262 | CYP704A   | 9 | + | 0   | F | F |                   |
| 20840282 | CYP088a   | 9 | + | 17  | C | C |                   |
| 20840639 | CYP075a   | 9 | + | 0   | F | F |                   |
| 20840694 | CYP078a   | 9 | + | 0   | F | F |                   |
| 20841029 | CYP099a   | 9 | + | 0   | F | F |                   |
| 20837150 | CYP071j   | 9 | - | 89  | C | C |                   |
| 20837265 | CYP701a   | 9 | - | 312 | C | C |                   |
| 20837344 | CYP709B   | 9 | - | 392 | C | E | E1-4              |

|          |           |    |   |     |   |   |              |
|----------|-----------|----|---|-----|---|---|--------------|
| 20837345 | CYP709B   | 9  | - | 0   | F | F |              |
| 20837734 | CYP701a   | 9  | - | 312 | C | C |              |
| 20837735 | CYP701a   | 9  | - | 0   | F | F |              |
| 20837966 | CYP071x   | 9  | - | 96  | C | E | I1 3aa shift |
| 20838041 | CYP709B   | 9  | - | 391 | C | C |              |
| 20838065 | CYP5A     | 9  | - | 330 | C | E | short N      |
| 20838066 | CYP005a   | 9  | - | 0   | F | F |              |
| 20838272 | CYP078a   | 9  | - | 273 | U | U |              |
| 20838345 | CYP709B   | 9  | - | 0   | F | F |              |
| 20838611 | CYP074a   | 9  | - | 467 | C | C |              |
| 20838695 | CYP079a   | 9  | - | 316 | C | C |              |
| 20838913 | CYP94D    | 9  | - | 451 | C | C |              |
| 20839039 | CYP072x   | 9  | - | 0   | F | F |              |
| 20839201 | CYP734A   | 9  | - | 383 | C | C |              |
| 20839485 | CYP093a   | 9  | - | 230 | C | C |              |
| 20841282 | CYP071x   | 9  | - | 96  | C | C |              |
| 20871964 | CYP093a   | 10 | + | 233 | C | C |              |
| 20872325 | CYP89A    | 10 | + | 0   | F | F |              |
| 20872448 | CYP94C    | 10 | + | 441 | C | C |              |
| 20872840 | reductase | 10 | + | 475 | X | X |              |
| 20873564 | CYP87A    | 10 | + | 56  | C | C |              |
| 20875139 | reductase | 10 | + | 475 | X | X |              |
| 20875140 | reductase | 10 | + | 0   | F | X |              |
| 20875319 | CYP071c   | 10 | + | 100 | E | C | missing E    |
| 20871820 | CYP704A   | 10 | - | 459 | E | C | retained I   |
| 20871821 | CYP704A   | 10 | - | 0   | F | F |              |
| 20872629 | CYP085a   | 10 | - | 0   | F | F |              |
| 20872630 | CYP085a   | 10 | - | 0   | F | F |              |
| 20872654 | CYP89A    | 10 | - | 306 | C | C |              |
| 20872699 | CYP071a   | 10 | - | 243 | E | C | ejj shift    |
| 20872934 | CYP703a   | 10 | - | 320 | C | C |              |
| 20872935 | CYP703a   | 10 | - | 0   | F | F |              |
| 20873412 | CYP20D    | 10 | - | 436 | C | C |              |
| 20873414 | CYP89A    | 10 | - | 306 | C | C |              |
| 20873658 | CYP715A   | 10 | - | 0   | F | F |              |
| 20873762 | CYP092a   | 10 | - | 0   | F | F |              |
| 20873927 | CYP87A    | 10 | - | 56  | C | C |              |
| 20874203 | CYP071c   | 10 | - | 100 | C | C |              |
| 20874476 | CYP94C    | 10 | - | 441 | C | C |              |
| 20874831 | CYP051a   | 10 | - | 323 | c | c | long N       |
| 20874832 | CYP051a   | 10 | - | 0   | F | F | short N      |
| 20875179 | CYP099a   | 10 | - | 191 | C | C |              |
| 20875371 | CYP093a   | 10 | - | 233 | E | C | missing E    |

|             | Maize Phytozome |     | Maize Refgs |     |
|-------------|-----------------|-----|-------------|-----|
| Correct     | C               | 201 | Correct     | 200 |
| Nearly good | c               | 13  | Nearly good | 24  |
| Uncertain   | U               | 4   | Uncertain   | 4   |
| Error       | E               | 25  | Error       | 15  |
| Pseudogene  | P               | 2   | Pseudoger   | 2   |
| Filtered    | F               | 118 | Filtered    | 118 |
| Non P450    | X               | 5   | Non P450    | 5   |
|             | Total           | 368 |             | 368 |

reductase Cytochrome P450 reductase  
AGE I-Ala-D/L-Glu epimerase-like

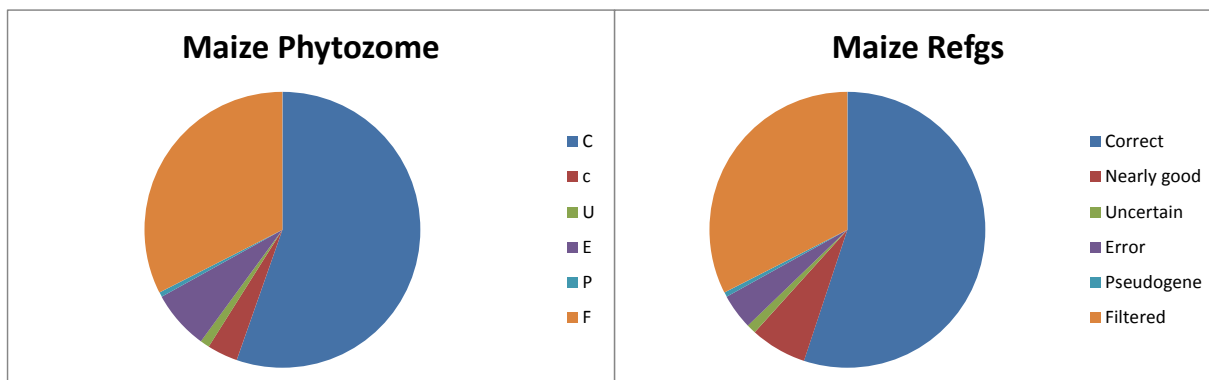



Table S3. Resources of Sequences and Annotations.

| SpecCode | Species                                       | Genome/Aa/GFF | EST/cDNA          |
|----------|-----------------------------------------------|---------------|-------------------|
| aquicoer | <a href="#">Aquilegia coerulea</a>            | Phytozome     | PlantGDB, UniGene |
| arablyra | <a href="#">Arabidopsis lyrata</a> *          | Phytozome     | JGI               |
| arabthal | <a href="#">Arabidopsis thaliana</a>          | Phytozome     | PlantGDB, UniGene |
| astespec | <a href="#">Asterochloris spec Cgr/DA1pho</a> | JGI           | JGI               |
| bracdist | <a href="#">Brachypodium distachyon</a> *     | Phytozome     | PlantGDB, UniGene |
| brasrapa | <a href="#">Brassica rapa</a>                 | Phytozome     | PlantGDB          |
| comesine | <a href="#">Camellia sinensis</a>             | Phytozome     | PlantGDB, GenBank |
| capsrube | <a href="#">Capsella rubella</a>              | Phytozome     | PlantGDB          |
| caripapa | <a href="#">Carica papaya</a> *               | Phytozome     | PlantGDB, GenBank |
| chlarein | <a href="#">Chlamydomonas reinhardtii</a> *   | Phytozome     | PlantGDB, UniGene |
| chlovari | <a href="#">Chlorella variabilis NC64A</a>    | JGI           | JGI               |
| chlovulg | <a href="#">Chlorella vulgaris</a>            | JGI           | JGI               |
| citrclem | <a href="#">Citrus clementina</a>             | Phytozome     | PlantGDB, UniGene |
| coccsube | <a href="#">Coccomyxa subellipsoidea</a>      | Phytozome     | PlantGDB          |
| cucusati | <a href="#">Cucumis sativus</a>               | Phytozome     | PlantGDB, GenBank |
| eucagran | <a href="#">Eucalyptus grandis</a>            | Phytozome     | PlantGDB, GenBank |
| fragvesc | <a href="#">Fragaria vesca</a>                | Phytozome     | PlantGDB, GenBank |
| glycmax_ | <a href="#">Glycine max</a> *                 | Phytozome     | PlantGDB, UniGene |
| gossraim | <a href="#">Gossypium raimondii</a>           | Phytozome     | PlantGDB, UniGene |
| jatrcurc | <a href="#">Jatropha curcas</a>               | Kazusa        | PlantGDB, GenBank |
| linuusit | <a href="#">Linum usitatissimum</a>           | Phytozome     | -                 |
| lotujapo | <a href="#">Lotus japonicus</a>               | Kazusa        | PlantGDB, UniGene |
| maniescu | <a href="#">Manihot esculenta</a>             | Phytozome     | PlantGDB, UniGene |
| meditrun | <a href="#">Medicago truncatula</a> *         | Phytozome     | PlantGDB, UniGene |
| micrpusi | <a href="#">Micromonas pusilla</a> *          | Phytozome     | JGI               |
| micrrcc2 | <a href="#">Micromonas rcc299</a> *           | Phytozome     | JGI, GenBank      |
| mimugutt | <a href="#">Mimulus guttatus</a>              | Phytozome     | PlantGDB, UniGene |
| oryzsati | <a href="#">Oryza sativa</a> *                | Phytozome     | PlantGDB, UniGene |
| ostrluci | <a href="#">Ostreococcus lucimarinus</a> *    | Phytozome     | PlantGDB, GenBank |
| ostrcc8  | <a href="#">Ostreococcus rcc809</a>           | JGI           | JGI               |
| ostrtaur | <a href="#">Ostreococcus tauri</a> *          | JGI           | JGI               |
| panivirg | <a href="#">Panicum virgatum</a>              | Phytozome     | -                 |

|          |                                                     |           |                   |
|----------|-----------------------------------------------------|-----------|-------------------|
| phasvulg | <a href="#"><i>Phaseolus vulgaris</i></a>           | Phytozome | PlantGDB, UniGene |
| physpate | <a href="#"><i>Physcomitrella patens</i></a> *      | Phytozome | PlantGDB, UniGene |
| poputric | <a href="#"><i>Populus trichocarpa</i></a> *        | Phytozome | PlantGDB, UniGene |
| prunpers | <a href="#"><i>Prunus persica</i></a>               | Phytozome | PlantGDB, UniGene |
| ricicomm | <a href="#"><i>Ricinus communis</i></a> *           | Phytozome | PlantGDB, UniGene |
| selamoel | <a href="#"><i>Selaginella moellendorffii</i></a> * | Phytozome | PlantGDB, UniGene |
| setaital | <a href="#"><i>Setaria italica</i></a>              | Phytozome | -                 |
| solalyco | <a href="#"><i>Solanum lycopersicum</i></a> *       | Phytozome | PlantGDB, UniGene |
| solatube | <a href="#"><i>Solanum tuberosum</i></a> *          | Phytozome | PlantGDB, UniGene |
| sorgbico | <a href="#"><i>Sorghum bicolor</i></a>              | Phytozome | PlantGDB, UniGene |
| thelhalo | <a href="#"><i>Thellungiella halophila</i></a>      | Phytozome | PlantGDB, GenBank |
| theocaca | <a href="#"><i>Theobroma cacao</i></a>              | Phytozome | PlantGDB, UniGene |
| vitivini | <a href="#"><i>Vitis vinifera</i></a> *             | Phytozome | PlantGDB, UniGene |
| volvcart | <a href="#"><i>Volvox carteri</i></a> *             | Phytozome | PlantGDB, UniGene |
| zea_mays | <a href="#"><i>Zea mays</i></a>                     | Phytozome | PlantGDB, UniGene |

| Resource  | URL                                                                                     |
|-----------|-----------------------------------------------------------------------------------------|
| Phytozome | <a href="http://www.phytozome.net/">http://www.phytozome.net/</a>                       |
| JGI       | <a href="http://genome.jgi.doe.gov/">http://genome.jgi.doe.gov/</a>                     |
| Kazusa    | <a href="http://www.kazusa.or.jp/e/index.html">http://www.kazusa.or.jp/e/index.html</a> |
| PlantGDB  | <a href="http://www.plantgdb.org/">http://www.plantgdb.org/</a>                         |
| UniGene   | <a href="http://www.ncbi.nlm.nih.gov/unigene">http://www.ncbi.nlm.nih.gov/unigene</a>   |
| Genbank   | <a href="http://www.ncbi.nlm.nih.gov/genbank/">http://www.ncbi.nlm.nih.gov/genbank/</a> |
