# Supplementary material for: Assessment and refinement of eukaryotic gene structure prediction with gene-structure-aware multiple protein sequence alignment
Source: BMC Bioinformatics. 2014 Jun 14;15:189. doi: 10.1186/1471-2105-15-189 (PMC4065584; doi:10.1186/1471-2105-15-189)
Supplement: Additional file 1: Figure S1 — Examples of GSA-MPSA before and after iterative refinement. Intron positions are indicated by triangles: phase 0 (orange), phase 1 (magenta), and phase 2 (blue). A, C, and E show the results from P450 clusters 1, 4, and 8, respectively, and B, D, and F show the results from ribosomal protein clusters 1, 4, and 1098, respectively, with MaxCluster = 50. For each cluster, CR-M1-PR refinement was performed. [file 1471-2105-15-189-S1.pdf]

Fig. S1B: An example of GSA-MPSA

▼ phase0 ▼ phase1 ▼ phase2

| (before)                                                        |                  |
|-----------------------------------------------------------------|------------------|
| >RBP_M50_Org.1 [15:368] ( 1 - 368 )                             |                  |
| 1 M-----                                                        | Aquicoer22023107 |
| 1 M-----                                                        | Arabylral6051447 |
| 1 M-----                                                        | Arabthal19639586 |
| 1 M-----                                                        | Arabthal19643610 |
| 1 -----                                                         | Ricicomm16828883 |
| 1 MR-----                                                       | Caripapal6415391 |
| 1 M-----                                                        | Oryzsati24147382 |
| 1 M-----                                                        | Zea_mays20838612 |
| 1 M-----                                                        | Zea_mays20839405 |
| 1 M-----                                                        | Zea_mays20865706 |
| 1 M-----                                                        | Zea_mays20841553 |
| 1 M-----                                                        | Setaital19693586 |
| 1 MW-----                                                       | Cucusatil6966640 |
| 1 M-----                                                        | Cucusatil6971357 |
| 1 MPLPKAKQEETYGPRSPGLRRQKSLPLKTEGTSDYSPKRRTRRGIGSPPTLPLGRNSGN   | Gossrain26824973 |
| @                                                               |                  |
| 2 -----                                                         | Aquicoer22023107 |
| 2 -----                                                         | Arabylral6051447 |
| 2 -----                                                         | Arabthal19639586 |
| 2 -----                                                         | Arabthal19643610 |
| 2 -----                                                         | Ricicomm16828883 |
| 1 -----                                                         | Caripapal6415391 |
| 2 -----                                                         | Oryzsati24147382 |
| 2 -----                                                         | Zea_mays20838612 |
| 2 -----                                                         | Zea_mays20839405 |
| 2 -----                                                         | Zea_mays20865706 |
| 2 -----                                                         | Zea_mays20841553 |
| 2 -----                                                         | Setaital19693586 |
| 3 -----                                                         | Cucusatil6966640 |
| 2 -----                                                         | Cucusatil6971357 |
| 61 GNSKPLSGWLNGFGRILNKVCEIPVPLFFAARFPNQISDVMKQLSKKASNCSEILS-    | Gossrain26824973 |
|                                                                 |                  |
| 2 -----                                                         | Aquicoer22023107 |
| 2 -----                                                         | Arabylral6051447 |
| 2 -----                                                         | Arabthal19639586 |
| 2 -----                                                         | Arabthal19643610 |
| 2 -----                                                         | Ricicomm16828883 |
| 1 -----                                                         | Caripapal6415391 |
| 2 -----                                                         | Oryzsati24147382 |
| 2 -----                                                         | Zea_mays20838612 |
| 2 -----                                                         | Zea_mays20839405 |
| 2 -----                                                         | Zea_mays20865706 |
| 2 -----                                                         | Zea_mays20841553 |
| 2 -----                                                         | Setaital19693586 |
| 2 -----                                                         | Cucusatil6966640 |
| 3 -----                                                         | Cucusatil6971357 |
| 2 -----                                                         | Gossrain26824973 |
| 120 -----                                                       |                  |
| . o._+ @@j+@@_S+M _..++.+@ @@ _j.o+ . _j                        |                  |
| 42 -TERDVIKLMVDAVEHIKPICEVKVGAGKIYDVPGIVARDRQQTLAIRWILGAAPKRR   | Aquicoer22023107 |
| 42 -TERDVIKLMVDAVENIKPICEVAKVGAGTIYDVPGIVARDRQQTLAIRWILEAAFKRR  | Arabylral6051447 |
| 42 -TERDVIKLMVDAVENIKPICEVAKVGAGTIYDVPGIVARDRQQTLAIRWILEAAFKRR  | Arabthal19639586 |
| 42 -TERDVIKLMVDAVENIKPICEVAKVGAGTIYDVPGIVARDRQQTLAIRWILEAAFKRR  | Arabthal19643610 |
| 23 -TERDVIKLMVDAIDNIKPICEVKVGAGTIYDVPGIVARDRQQTLAIRWILEAAFKRR   | Ricicomm16828883 |
| 65 RTERDVIQPLVDAVENIKPICEVKVGAGTIYDVPGIVARDRQQTLAIRWILEAAFKRR   | Caripapal6415391 |
| 42 -TERDVIKLMVDAVDNIKPICEVKVGAGTIYDVPGILARDRQQTLAIRWILGAAPKRR   | Oryzsati24147382 |
| 42 -TERDVIKLMVDAVDNIKPICEVKVGAGTIYDVPGIVARDRQQTLAIRWILGAAPKRR   | Zea_mays20838612 |
| 42 -TERDVIKLMVDAVDNIKPICEVKVGAGTIYDVPGIVARDRQQTLAIRWILGAAPKRR   | Zea_mays20839405 |
| 42 -TERDVIKLMVDAVDNIKPICEVKVGAGTIYDVPGIVARDRQQTLAIRWILGAAPKRR   | Zea_mays20865706 |
| 42 -TERDVIKLMVDAVDNIKPICEVKVGAGTIYDVPGIVARDRQQTLAIRWILGAAPKRR   | Zea_mays20841553 |
| 42 -TERDVIKLMVDAVDNIKPICEVKVGAGTIYDVPGIVARDRQQTLAIRWILGAAPKRR   | Setaital19693586 |
| 43 -TERDGIKLMVEAVENIKPICEVKVRVAATFFYVPGIVANDRQQTLAIRWIFEAAPKRR  | Cucusatil6966640 |
| 42 -TERDGIKLMVEAVENIKPICEVKVRVAATFFYVPGIVANDRQQTLAIRWIFEAAPKRR  | Cucusatil6971357 |
| 143 -----                                                       | Gossrain26824973 |
| ..+_ .@j@@_.._jIKPICEV K @A. oY VPGI@AjDRQQTLAIRWIo AAFKRR      |                  |
|                                                                 |                  |
| 101 ISYRISLEKCSFAEILDAYKRGIAIRKQKRENHLGLASTNR--SFAHR-           | Aquicoer22023107 |
| 101 ISYRISLEKCSFAEILDAYKRGISARRKRENHLGLASTNR--SFAHR-            | Arabylral6051447 |
| 101 ISYRISLEKCSFAEILDAYKRGISARRKRENHLGLASTNR--SFAHR-            | Arabthal19639586 |
| 101 ISYRISLEKCSFAEILDAYKRGISARRKRENHLGLASTNR--SFAHR-            | Arabthal19643610 |
| 82 ISYRISLEKCSFAEILDAYKRGIA--                                   | Ricicomm16828883 |
| 125 ISYRISLEKCSFDEILDAYKMGIAIRKQKRENHLGLASTNR--SFAHR-           | Caripapal6415391 |
| 101 ISYRISLEKCSFAEILDAYKRGISIRKQKRENHLGLASTNR--SFAHR-           | Oryzsati24147382 |
| 101 ISYRISLEKCSFAEILDAYKRGISIRKQKRENHLGLASTNR--SFAHR-           | Zea_mays20838612 |
| 101 ISYRISLEKCSFAEILDAYKRGISIRKQKRENHLGLASTNR--SFAHR-           | Zea_mays20839405 |
| 101 ISYRISLEKCSFAEILDAYKRGISIRKQKRENHLGLASTNR--SFAHR-           | Zea_mays20865706 |
| 101 ISYRISLEKCSFAEILDAYKRGISIRKQKRENHLGLASTNR--SFAHR-           | Zea_mays20841553 |
| 101 ISYRISLEKCSFAEILDAYKRGISIRKQKRENHLGLASTNR--SFAHR-           | Setaital19693586 |
| 102 ISYKISLEKCSFDEILDAYKRGIAIRKQKRENHLRLASTNR--SFAHR-           | Cucusatil6966640 |
| 101 ISYRISLEKCSFDEILDAYKRGIAIRKQKRENHLRLASTNR--SFAHR-           | Cucusatil6971357 |
| 189 ISYRISLEKCSFAEILDAYKRGIAIRKQKRENHLGLSSTNRGFPFPRLTRGADLINALQ | Gossrain26824973 |
| ISY+ISLEKCSF EILDAYjK G .++++ _@+ @...+_ \$ . \$+               |                  |
|                                                                 |                  |
| 147 -----                                                       | Aquicoer22023107 |
| 147 -----                                                       | Arabylral6051447 |
| 147 -----                                                       | Arabthal19639586 |
| 147 -----                                                       | Arabthal19643610 |
| 107 -----                                                       | Ricicomm16828883 |
| 171 -----                                                       | Caripapal6415391 |
| 147 -----                                                       | Oryzsati24147382 |
| 147 -----                                                       | Zea_mays20838612 |
| 147 -----                                                       | Zea_mays20839405 |
| 147 -----                                                       | Zea_mays20865706 |
| 147 -----                                                       | Zea_mays20841553 |
| 147 -----                                                       | Setaital19693586 |
| 148 -----                                                       | Cucusatil6966640 |
| 147 -----                                                       | Cucusatil6971357 |
| 249 REGSQVSHVYFWGQAKVRARHLAMNSVTGSLSLCTLASQVQIDSSERWACHVKAGPSN  | Gossrain26824973 |
| \$                                                              |                  |
|                                                                 |                  |
| 149 -----                                                       | Aquicoer22023107 |
| 149 -----                                                       | Arabylral6051447 |
| 149 -----                                                       | Arabthal19639586 |
| 149 -----                                                       | Arabthal19643610 |
| 107 -----                                                       | Ricicomm16828883 |
| 173 -----                                                       | Caripapal6415391 |
| 149 -----                                                       | Oryzsati24147382 |
| 149 -----                                                       | Zea_mays20838612 |
| 149 -----                                                       | Zea_mays20839405 |
| 149 -----                                                       | Zea_mays20865706 |
| 149 -----                                                       | Zea_mays20841553 |
| 149 -----                                                       | Setaital19693586 |
| 150 -----                                                       | Cucusatil6966640 |
| 149 -----                                                       | Cucusatil6971357 |
| 309 DCTKSLRH                                                    | Gossrain26824973 |

| (after)                                                          |                  |
|------------------------------------------------------------------|------------------|
| >RBP_M50_Trd.1 [15:150] ( 1 - 150 )                              |                  |
| 1 M-GGLDGEQKQLINKLVNFRMKEGKRRTRVRAIVYQTFHRRPAR-TERDVIKLMVDAVEHIK | Aquicoer22023107 |
| 1 M-GGLDGEQKLLIKKLVNFRMKEGKRRTRVRAIVYQTFHRRPAR-TERDVIKLMVDAVENIK | Arabylral6051447 |
| 1 M-GGLDGEQKLLIKKLVNFRMKEGKRRTRVRAIVYQTFHRRPAR-TERDVIKLMVDAVENIK | Arabthal19639586 |
| 1 M-GGLDGEQKLLIKKLVNFRMKEGKRRTRVRAIVYQTFHRRPAR-TERDVIKLMVDAVENIK | Arabthal19643610 |
| 1 M-GDFDGEQKELIKKLVNFRMIDGKRRTRVRAIVYKTFHRLAR-TERDVIKLMVDAVDNIK  | Oryzsati24147382 |
| 1 M-GDFDGEQKELIKKLVNFRMIDGKRRTRVRAIVYKTFHRLAR-TERDVIKLMVDAVDNIK  | Zea_mays20838612 |
| 1 M-GDFDGEQKELIKKLVNFRMIDGKRRTRVRAIVYKTFHRLAR-TERDVIKLMVDAVDNIK  | Zea_mays20839405 |
| 1 M-GDFDGEQKELIKKLVNFRMIDGKRRTRVRAIVYKTFHRLAR-TERDVIKLMVDAVDNIK  | Zea_mays20865706 |
| 1 M-GDFDGEQKELIKKLVNFRMIDGKRRTRVRAIVYKTFHRLAR-TERDVIKLMVDAVDNIK  | Setaital19693586 |
| 1 MWGGLDGEQKELIKKLVNFRMKEGKRTKVRVILSQTLNRPAQ-TERDGIKLMVEAVENIK   | Cucusatil6966640 |
| 1 M-GGLDGEQKELIKKLVNFRMKEGKRRTRVRAILYQTLNRPAQ-TERDGIKLMVEAVENIK  | Cucusatil6971357 |
| 1 M-GGLDGEQKQLIKKLVNFRMKEGKRRTRVRAIVYQTFHRRPAR-TERDVIKLMVDAIDNIK | Ricicomm16828883 |
| 1 M-GGLDGEQKQLIKKLVNFRMKEGKTRVRAIVYQTFHRRPAR-TERDVIKLMVDAVENIK   | Gossrain26824973 |
| M G oDGEQK LiJkLVNFRM _GKj+VR Io jToJr Aj TjD Ijo@V_A_ _jIK      | Caripapal6415391 |
|                                                                  |                  |
| 59 PICEVEKVGAGKIYDVPGIVARDRQQTLAIRWILGAAPKRRISYRISLEKCSFABILDA   | Aquicoer22023107 |
| 59 PICEVAKVGAGTIYDVPGIVARDRQQTLAIRWILEAAFKRRISYRISLEKCSFABILDA   | Arabylral6051447 |
| 59 PICEVAKVGAGTIYDVPGIVARDRQQTLAIRWILEAAFKRRISYRISLEKCSFABILDA   | Arabthal19639586 |
| 59 PICEVAKVGAGTIYDVPGIVARDRQQTLAIRWILEAAFKRRISYRISLEKCSFABILDA   | Arabthal19643610 |
| 59 PICEVVKVGAGTIYDVPGLIARDRQQTLAIRWILGAAPKRRISYRISLEKCSFABILDA   | Oryzsati24147382 |
| 59 PICEVVKVGAGTIYDVPGIVARDRQQTLAIRWILGAAPKRRISYRISLEKCSFABILDA   | Zea_mays20838612 |
| 59 PICEVVKVGAGTIYDVPGIVARDRQQTLAIRWILGAAPKRRISYRISLEKCSFABILDA   | Zea_mays20839405 |
| 59 PICEVVKVGAGTIYDVPGIVARDRQQTLAIRWILGAAPKRRISYRISLEKCSFABILDA   | Zea_mays20865706 |
| 59 PICEVVKVGAGTIYDVPGIVARDRQQTLAIRWILGAAPKRRISYRISLEKCSFABILDA   | Setaital19693586 |
| 60 PICEVEKVRVATTFYVPGIVANDRQQTLAIRWIFEAAPKRRISYKISLEKCSFDEILDA   | Cucusatil6966640 |
| 59 PICEVEKVRVATTFYVPGIVANDRQQTLAIRWILEAAFKRRISYRISLEKCSFDEILDA   | Cucusatil6971357 |
| 59 PICEVEKVGAGTIYDVPGIVARDRQQTLAIRWILEAAFKRRISYRISLEKCSFABILDA   | Ricicomm16828883 |
| 59 PICEVEKVRVAGTIYDVPGIVAKDRQQTLAIRWILEAAFKRRISYRISLEKCSFABILDA  | Gossrain26824973 |
| 60 PICEVEKVRVAGTIYDVPGIVARDRQQTLAIRWILEAAFKRRISYRISLEKCSFDEILDA  | Caripapal6415391 |
| PICEV KV @A. oY VPGI@AjDRQQTLAIRWIo AAFKRRISY+ISLEKCSF EILDA     |                  |
|                                                                  |                  |
| 119 YRKRGIAIRKQKRENHLGLASTNRRFAHFRWW                             | Aquicoer22023107 |
| 119 YQKRGSAIRKQKRENHLGLASTNRSFAHFRWW                             | Arabylral6051447 |
| 119 YQKRGSAIRKQKRENHLGLASTNRSFAHFRWW                             | Arabthal19639586 |
| 119 YQKRGSAIRKQKRENHLGLASTNRSFAHFRWW                             | Arabthal19643610 |
| 119 YRKRGISIRKRRGNLHGLASTNRSFAHFRWW                              | Oryzsati24147382 |
| 119 YRKRGISIRKRRGNLHGLASTNRSFAHFRWW                              | Zea_mays20838612 |
| 119 YRKRGISIRKRRGNLHGLASTNRSFAHFRWW                              | Zea_mays20839405 |
| 119 YRKRGISIRKRRGNLHGLASTNRSFAHFRWW                              | Zea_mays20865706 |
| 119 YRKRGISIRKRRGNLHGLASTNRSFAHFRWW                              | Setaital19693586 |
| 120 YRKRGIAIRKQKRENHLRLASTNRSFAHFRWW                             | Cucusatil6966640 |
| 119 YRKRGIAIRKQKRENHLRLASTNRSFAHFRWW                             | Cucusatil6971357 |
| 119 YRKRGIAIRKQKRENHLRLASTNRSFAHFRWW                             | Ricicomm16828883 |
| 119 YRKRGIAIRKQKRENHLRLASTNRSFAHFRWW                             | Gossrain26824973 |
| 120 YKKGIAIRKQKRENHLGLASTNRSFAHFRWW                              | Caripapal6415391 |
| YjK G .R++R NLH L.STNR FAHFRWW                                   |                  |
